# Supplementary material for: The case for a universal hepatitis C vaccine to achieve hepatitis C elimination
Source: Springer Nature journal article supplement (doi:10.1186/s12916-019-1411-9), 2019-09-18
Supplement: MOESM1 [file 17185380]

## Supplementary material: The case for a universal hepatitis C vaccine to achieve hepatitis C elimination

### APPENDIX A: COUNTRY SPECIFIC MODEL INPUTS

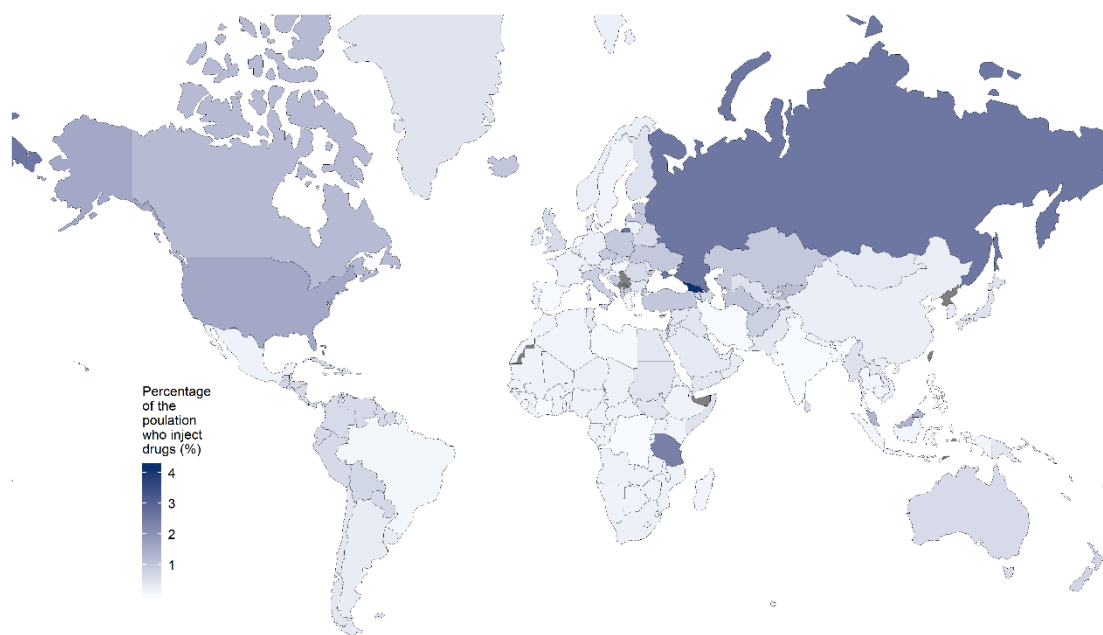

**Figure S1: Proportion of the population who inject drugs.** Based on Degenhardt et al.<sup>1</sup> For countries without estimates, population-weighted averages were calculated for each WHO region and applied.

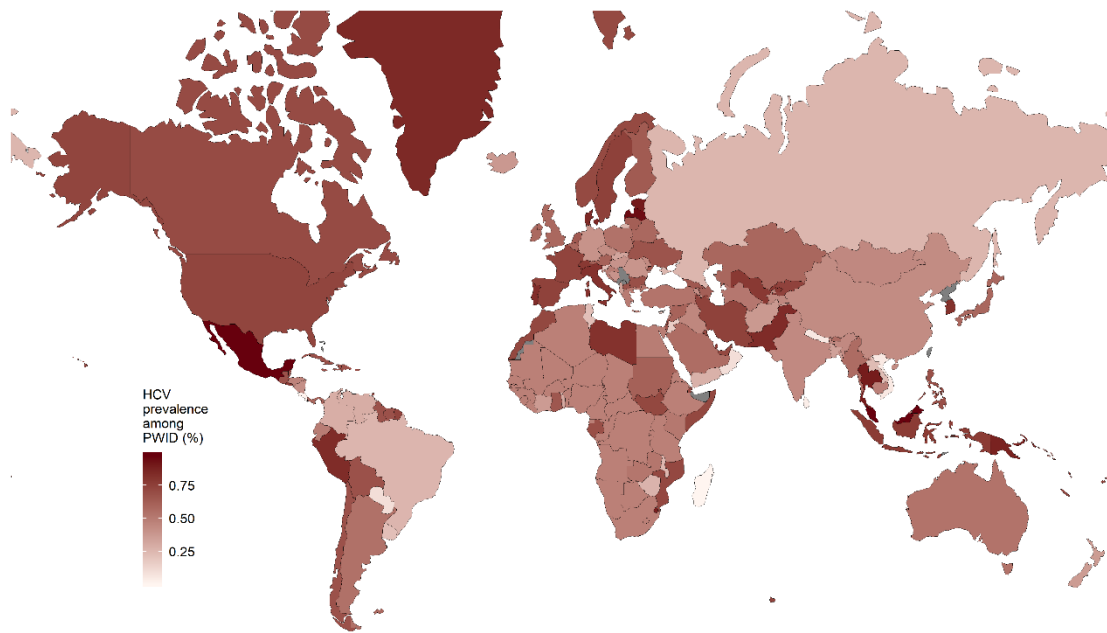

**Figure S2: hepatitis C prevalence among people who inject drugs used for model input.** Based on Degenhardt et al.<sup>1</sup> For countries without estimates, population-weighted averages were calculated for each WHO region and applied. Grey countries are missing data.

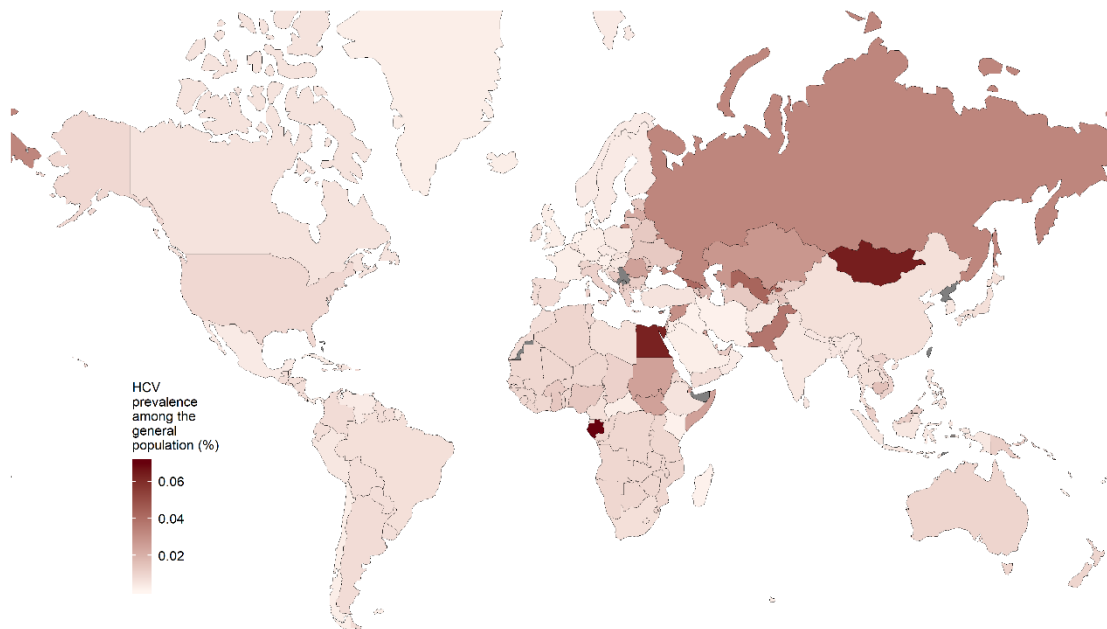

**Figure S3: hepatitis C prevalence among the general population used for model input.** Based on Blach et al.<sup>2</sup> and Gower et al.<sup>3</sup> For countries without estimates, population-weighted averages were calculated for each WHO region and applied.

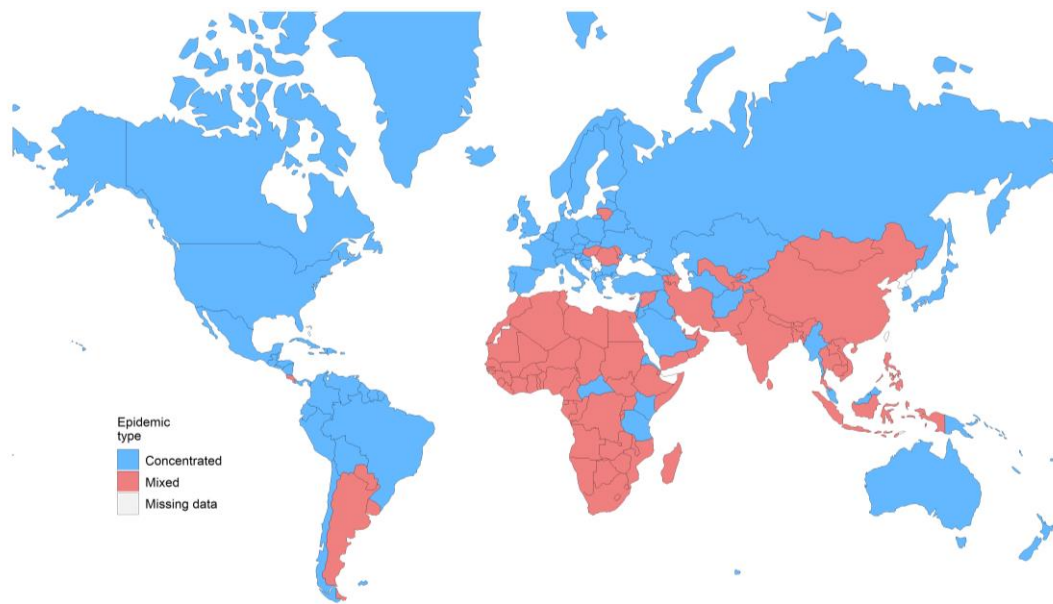

**Figure S4: Epidemic type classification used for model input.** Epidemics were classified as mixed, meaning that infection was possible among the general population as well as among PWID, if the country was not in a WHO high income classification AND the total number of people living with hepatitis C was >5 times the total number of estimated hepatitis C-infected PWID. This was done as without transmission among the general population, the model was unable to produce the correct number of people living with hepatitis C based on injecting drug use-related transmission alone.

**Table S1: Country specific model inputs.**

| Country             | Epidemic type <sup>a</sup> | Adult population (2016) <sup>b</sup> | Percent of the population who inject drugs <sup>c</sup> | Total number of PWID <sup>d</sup> | hepatitis C prevalence among PWID <sup>e</sup> | hepatitis C prevalence among the general population <sup>f</sup> | Staff costs per testing, treatment, or vaccination interaction <sup>g</sup> |
|---------------------|----------------------------|--------------------------------------|---------------------------------------------------------|-----------------------------------|------------------------------------------------|------------------------------------------------------------------|-----------------------------------------------------------------------------|
| Afghanistan         | concentrated               | 18,575,258                           | 0.80%                                                   | 148,602                           | 38%                                            | 0.50%                                                            | \$0.71                                                                      |
| Albania             | concentrated               | 1,997,271                            | 0.66%*                                                  | 13,182                            | 34%                                            | 1.34%*                                                           | \$5.24                                                                      |
| Algeria             | mixed                      | 26,383,347                           | 0.10%*                                                  | 26,383                            | 48%*                                           | 1.00%                                                            | \$4.97                                                                      |
| Angola              | mixed                      | 14,605,793                           | 0.10%*                                                  | 14,606                            | 48%*                                           | 0.95%*                                                           | \$4.20                                                                      |
| Antigua and Barbuda | concentrated               | 69,717                               | 0.42%*                                                  | 293                               | 68%*                                           | 0.75%*                                                           | \$18.36                                                                     |
| Argentina           | mixed                      | 28,009,966                           | 0.29%                                                   | 81,229                            | 55%                                            | 0.80%                                                            | \$15.80                                                                     |
| Armenia             | mixed                      | 2,018,577                            | 0.62%                                                   | 12,515                            | 43%                                            | 1.34%*                                                           | \$4.59                                                                      |
| Australia^^         | concentrated               | 15,942,528                           | 0.60%                                                   | 95,655                            | 40%                                            | 0.74%                                                            | \$63.18                                                                     |
| Austria             | concentrated               | 5,839,284                            | 0.32%                                                   | 18,686                            | 61%                                            | 0.20%                                                            | \$56.84                                                                     |
| Azerbaijan          | mixed                      | 6,926,250                            | 0.61%                                                   | 42,250                            | 62%                                            | 1.90%                                                            | \$4.93                                                                      |
| Bahrain             | mixed                      | 1,102,591                            | 0.23%*                                                  | 2,536                             | 72%*                                           | 1.20%                                                            | \$28.67                                                                     |
| Bangladesh          | mixed                      | 107,583,339                          | 0.07%                                                   | 75,308                            | 34%                                            | 0.51%*                                                           | \$1.73                                                                      |
| Belarus             | concentrated               | 6,554,281                            | 0.59%                                                   | 38,670                            | 58%                                            | 1.34%*                                                           | \$6.34                                                                      |
| Belgium             | concentrated               | 7,324,673                            | 0.35%                                                   | 25,636                            | 58%                                            | 0.60%                                                            | \$52.41                                                                     |
| Belize              | concentrated               | 235,740                              | 0.42%*                                                  | 990                               | 68%*                                           | 0.75%*                                                           | \$6.03                                                                      |

|                                  |              |             |        |           |      |        |          |
|----------------------------------|--------------|-------------|--------|-----------|------|--------|----------|
| Benin                            | mixed        | 5,859,997   | 0.10%* | 5,860     | 48%* | 0.95%* | \$1.00   |
| Bhutan                           | mixed        | 544,687     | 0.10%  | 558       | 57%* | 0.51%* | \$3.52   |
| Bolivia                          | concentrated | 6,683,948   | 0.42%* | 28,073    | 68%* | 0.75%* | \$3.94   |
| Bosnia and Herzegovina           | concentrated | 2,449,320   | 0.66%* | 16,166    | 40%  | 1.34%* | \$6.11   |
| Botswana                         | mixed        | 1,452,622   | 0.10%* | 1,453     | 48%* | 0.95%* | \$8.79   |
| Brazil                           | concentrated | 144,560,447 | 0.10%  | 144,560   | 26%  | 0.70%  | \$10.98  |
| Brunei                           | concentrated | 305,929     | 0.23%* | 704       | 48%* | 0.74%* | \$34.21  |
| Bulgaria                         | concentrated | 4,663,920   | 0.38%  | 17,723    | 69%  | 1.20%  | \$9.48   |
| Burkina Faso                     | mixed        | 9,733,933   | 0.10%* | 9,734     | 48%* | 1.30%  | \$0.80   |
| Burundi                          | mixed        | 5,535,519   | 0.10%* | 5,536     | 48%* | 1.00%  | \$0.36   |
| Cambodia                         | mixed        | 10,143,144  | 0.11%  | 11,157    | 48%* | 1.60%  | \$1.61   |
| Cameroon                         | mixed        | 12,641,093  | 0.10%* | 12,641    | 48%* | 0.70%  | \$1.75   |
| Canada                           | concentrated | 24,462,794  | 1.22%  | 298,446   | 71%  | 0.60%  | \$53.78  |
| Central African Republic         | concentrated | 2,427,789   | 0.10%* | 2,428     | 48%* | 0.30%  | \$0.49   |
| Chad                             | mixed        | 7,247,070   | 0.10%* | 7,247     | 48%* | 1.10%  | \$0.84   |
| Chile                            | concentrated | 12,304,561  | 0.38%  | 46,757    | 68%* | 0.30%  | \$17.51  |
| China                            | mixed        | 995,072,896 | 0.25%  | 2,487,682 | 43%  | 0.70%  | \$10.32  |
| Colombia                         | concentrated | 33,463,378  | 0.42%* | 140,546   | 29%  | 0.80%  | \$7.37   |
| Comoros                          | mixed        | 454,278     | 0.10%* | 454       | 48%* | 0.95%* | \$0.98   |
| Costa Rica                       | mixed        | 3,345,218   | 0.42%* | 14,050    | 2%   | 0.75%* | \$15.02  |
| Croatia                          | concentrated | 2,754,710   | 0.23%  | 6,336     | 50%  | 0.60%  | \$15.43  |
| Cuba                             | concentrated | 7,979,569   | 0.42%* | 33,514    | 68%* | 0.30%  | \$12.70* |
| Cyprus                           | mixed        | 819,142     | 0.08%  | 655       | 18%  | 2.49%* | \$29.89  |
| Czechia                          | concentrated | 6,999,761   | 0.97%  | 67,625    | 43%  | 0.40%  | \$23.47  |
| Democratic Republic of the Congo | mixed        | 39,867,115  | 0.02%  | 7,874     | 48%* | 0.95%* | \$2.27*  |
| Denmark                          | concentrated | 3,664,484   | 0.45%  | 16,490    | 85%  | 0.30%  | \$68.04  |
| Djibouti                         | mixed        | 605,638     | 0.23%* | 1,393     | 72%* | 2.49%* | \$7.26*  |
| Dominican Republic               | concentrated | 6,767,761   | 0.42%* | 28,425    | 68%* | 0.60%  | \$8.54   |
| Ecuador                          | concentrated | 10,550,807  | 0.42%* | 44,313    | 49%  | 0.75%* | \$7.64   |
| Egypt^^                          | mixed        | 58,789,880  | 0.23%* | 135,217   | 35%  | 4.46%  | \$4.42   |
| El Salvador                      | concentrated | 4,067,975   | 0.42%* | 17,085    | 79%  | 0.75%* | \$5.36   |
| Equatorial Guinea                | mixed        | 730,225     | 0.10%* | 730       | 48%* | 0.95%* | \$11.11  |
| Eritrea                          | concentrated | 2,406,710   | 0.10%* | 2,407     | 48%* | 0.95%* | \$2.27*  |
| Estonia                          | concentrated | 850,705     | 0.94%  | 7,997     | 91%  | 1.40%  | \$22.52  |
| Ethiopia                         | mixed        | 56,725,456  | 0.10%* | 56,725    | 48%* | 0.60%  | \$0.90   |
| Fiji                             | concentrated | 587,548     | 0.23%* | 1,351     | 74%  | 0.10%  | \$6.65   |
| Finland                          | concentrated | 3,453,483   | 0.46%  | 15,886    | 64%  | 0.40%  | \$55.15  |
| France^^                         | concentrated | 41,793,933  | 0.20%  | 83,588    | 60%  | 0.24%  | \$46.80  |
| Gabon                            | mixed        | 1,181,086   | 0.10%* | 1,181     | 69%  | 7.00%  | \$9.12   |
| Gambia                           | mixed        | 1,062,851   | 0.10%* | 1,063     | 48%* | 0.80%  | \$0.60   |
| Georgia                          | concentrated | 2,466,709   | 4.19%  | 103,355   | 65%  | 4.20%  | \$4.91   |
| Germany                          | concentrated | 54,145,785  | 0.24%  | 129,950   | 40%  | 0.30%  | \$53.54  |
| Ghana                            | mixed        | 16,341,478  | 0.10%* | 16,341    | 66%  | 1.40%  | \$1.92   |

|               |              |             |        |         |      |        |          |
|---------------|--------------|-------------|--------|---------|------|--------|----------|
| Greece        | concentrated | 7,050,669   | 0.07%  | 4,935   | 50%  | 1.10%  | \$22.72  |
| Guatemala     | concentrated | 9,907,744   | 0.42%* | 41,613  | 68%* | 0.75%* | \$5.27   |
| Guinea        | mixed        | 6,748,593   | 0.10%* | 6,749   | 48%* | 0.95%* | \$0.84   |
| Guinea-Bissau | mixed        | 1,006,798   | 0.10%* | 1,007   | 48%* | 0.95%* | \$0.81   |
| Guyana        | concentrated | 505,827     | 0.42%* | 2,124   | 68%* | 0.75%* | \$5.75   |
| Haiti         | concentrated | 6,719,916   | 0.42%* | 28,224  | 68%* | 0.75%* | \$0.94   |
| Honduras      | concentrated | 5,756,968   | 0.42%* | 24,179  | 47%  | 0.75%* | \$3.00   |
| Hungary       | mixed        | 6,637,582   | 0.06%  | 3,983   | 40%  | 0.50%  | \$16.28  |
| Iceland^^     | concentrated | 220,576     | 0.66%* | 1,456   | 38%# | 0.2%   | \$76.86  |
| India         | mixed        | 873,908,707 | 0.04%* | 349,563 | 44%  | 0.50%  | \$2.17   |
| Indonesia     | mixed        | 175,328,142 | 0.11%  | 192,861 | 77%  | 0.50%  | \$4.53   |
| Iran          | mixed        | 57,086,320  | 0.28%  | 159,842 | 75%  | 0.20%  | \$6.63   |
| Iraq          | concentrated | 20,962,705  | 0.23%* | 48,214  | 45%  | 0.20%  | \$5.85   |
| Ireland       | concentrated | 3,073,960   | 0.27%  | 8,300   | 58%  | 0.60%  | \$81.49  |
| Israel        | concentrated | 5,180,967   | 0.66%* | 34,194  | 68%  | 1.20%  | \$47.21  |
| Italy^^       | concentrated | 38,609,106  | 0.83%  | 320,456 | 72%  | 0.98%  | \$38.94  |
| Ivory Coast   | mixed        | 12,917,333  | 0.01%  | 1,292   | 37%  | 0.95%* | \$1.95   |
| Jamaica       | concentrated | 1,945,801   | 0.42%* | 8,172   | 68%* | 0.75%* | \$6.20   |
| Japan^^       | concentrated | 76,831,284  | 0.47%  | 361,107 | 49%  | 0.58%  | \$49.49  |
| Jordan        | concentrated | 5,714,481   | 0.23%* | 13,143  | 16%  | 0.30%  | \$5.19   |
| Kazakhstan    | concentrated | 11,701,081  | 0.96%  | 112,330 | 59%  | 2.80%  | \$9.80   |
| Kenya         | concentrated | 27,372,406  | 0.12%  | 32,847  | 51%  | 0.20%  | \$1.85   |
| Kuwait        | mixed        | 3,113,472   | 0.23%* | 7,161   | 72%* | 2.49%* | \$34.74  |
| Kyrgyzstan    | concentrated | 3,898,697   | 0.74%  | 28,850  | 74%  | 1.34%* | \$1.37   |
| Laos          | mixed        | 4,242,601   | 0.23%* | 9,758   | 23%  | 0.74%* | \$2.97   |
| Latvia        | concentrated | 1,278,276   | 0.92%  | 11,760  | 95%  | 2.20%  | \$17.87  |
| Lebanon       | concentrated | 4,091,304   | 0.23%* | 9,410   | 41%  | 0.20%  | \$10.49  |
| Lesotho       | mixed        | 1,322,124   | 0.10%* | 1,322   | 48%* | 0.95%* | \$1.32   |
| Liberia       | mixed        | 2,530,636   | 0.10%* | 2,531   | 48%* | 0.95%* | \$0.58   |
| Libya         | mixed        | 4,230,347   | 0.05%  | 2,115   | 81%  | 0.70%  | \$31.98* |
| Lithuania     | mixed        | 1,906,357   | 0.22%  | 4,194   | 62%  | 1.10%  | \$18.94  |
| Luxembourg    | concentrated | 404,123     | 0.57%  | 2,304   | 81%  | 0.90%  | \$127.92 |
| Macedonia     | concentrated | 1,464,085   | 0.66%* | 9,663   | 67%  | 1.34%* | \$6.65   |
| Madagascar    | mixed        | 13,898,297  | 0.12%  | 16,678  | 1%   | 0.20%  | \$0.51   |
| Malawi        | mixed        | 9,539,262   | 0.10%* | 9,539   | 25%  | 0.95%* | \$0.38   |
| Malaysia      | concentrated | 21,613,466  | 1.33%  | 287,459 | 97%  | 1.20%  | \$12.07  |
| Mali          | mixed        | 8,932,211   | 0.10%* | 8,932   | 48%* | 0.95%* | \$0.99   |
| Mauritania    | mixed        | 2,442,002   | 0.10%* | 2,442   | 48%* | 0.95%* | \$1.40   |
| Mauritius     | concentrated | 892,649     | 0.78%  | 6,963   | 48%* | 0.95%* | \$12.23  |
| Mexico        | concentrated | 84,512,801  | 0.18%  | 152,123 | 97%  | 0.40%  | \$10.42  |
| Moldova       | mixed        | 2,626,915   | 0.40%  | 10,508  | 43%  | 1.34%* | \$2.41   |
| Mongolia      | mixed        | 2,020,751   | 0.23%* | 4,648   | 36%  | 5.15%  | \$4.69   |
| Morocco       | mixed        | 23,237,448  | 0.13%  | 30,209  | 72%* | 0.80%  | \$3.67   |
| Mozambique    | mixed        | 14,943,954  | 0.20%  | 29,888  | 72%  | 0.95%* | \$0.49   |
| Myanmar       | concentrated | 35,494,275  | 0.48%  | 170,373 | 57%* | 0.51%* | \$1.52   |
| Namibia       | mixed        | 1,477,758   | 0.10%* | 1,478   | 48%* | 0.95%* | \$5.61   |

|                       |              |             |        |           |      |        |          |
|-----------------------|--------------|-------------|--------|-----------|------|--------|----------|
| Nepal                 | mixed        | 18,166,451  | 0.20%  | 36,333    | 6%   | 0.51%* | \$0.93   |
| Netherlands^^         | concentrated | 11,076,563  | 0.03%  | 3,323     | 49%  | 0.08%  | \$57.95  |
| New Zealand           | concentrated | 3,059,011   | 0.73%  | 22,331    | 37%  | 1.00%  | \$50.05  |
| Nicaragua             | concentrated | 4,012,544   | 0.42%* | 16,853    | 42%  | 0.75%* | \$2.73   |
| Niger                 | mixed        | 9,761,597   | 0.10%* | 9,762     | 48%* | 0.95%* | \$0.46   |
| Nigeria               | mixed        | 98,882,303  | 0.10%* | 98,882    | 48%* | 1.40%  | \$2.76   |
| Norway                | concentrated | 3,433,905   | 0.24%  | 8,241     | 71%  | 0.40%  | \$89.99  |
| Oman                  | mixed        | 3,346,874   | 0.23%* | 7,698     | 10%  | 0.40%  | \$19.03  |
| Pakistan              | mixed        | 117,113,479 | 0.37%  | 433,320   | 84%  | 3.80%  | \$1.83   |
| Panama                | concentrated | 2,607,394   | 0.42%* | 10,951    | 59%  | 0.30%  | \$17.37  |
| Papua New Guinea      | concentrated | 4,851,119   | 0.23%* | 11,158    | 88%  | 1.20%  | \$3.17   |
| Paraguay              | mixed        | 4,309,857   | 0.42%* | 18,101    | 10%  | 0.75%* | \$5.18   |
| Peru                  | concentrated | 20,768,436  | 0.42%* | 87,227    | 84%  | 0.50%  | \$7.68   |
| Philippines           | mixed        | 65,451,034  | 0.04%  | 26,180    | 69%  | 0.60%  | \$3.75   |
| Poland                | concentrated | 26,202,640  | 0.66%* | 172,937   | 54%  | 0.50%  | \$15.76  |
| Portugal              | concentrated | 6,713,450   | 0.22%  | 14,770    | 83%  | 0.80%  | \$25.23  |
| Qatar                 | mixed        | 2,182,534   | 0.23%* | 5,020     | 78%  | 1.60%  | \$75.33  |
| Republic of the Congo | mixed        | 2,779,937   | 0.10%* | 2,780     | 48%* | 0.95%* | \$12.09  |
| Romania               | mixed        | 13,251,748  | 0.62%  | 82,161    | 39%  | 2.50%  | \$11.11  |
| Russia                | concentrated | 99,477,057  | 1.78%  | 1,770,692 | 26%  | 3.30%  | \$11.11  |
| Rwanda                | mixed        | 6,750,468   | 0.03%  | 2,025     | 48%* | 0.95%* | \$0.89   |
| Saudi Arabia          | concentrated | 23,013,048  | 0.23%* | 52,930    | 56%  | 0.30%  | \$25.43  |
| Senegal               | mixed        | 8,323,176   | 0.10%* | 8,323     | 48%* | 0.95%* | \$1.21   |
| Singapore             | concentrated | 4,063,707   | 0.23%* | 9,347     | 48%* | 0.74%* | \$67.25  |
| Sierra Leone          | mixed        | 4,072,319   | 0.04%  | 1,629     | 48%  | 0.95%* | \$0.64   |
| Slovakia              | concentrated | 3,809,944   | 0.49%  | 18,669    | 33%  | 0.60%  | \$20.99  |
| Slovenia              | concentrated | 1,376,715   | 0.42%  | 5,782     | 22%  | 0.30%  | \$27.49  |
| Solomon Islands       | concentrated | 343,603     | 0.23%* | 790       | 48%* | 0.74%* | \$2.55   |
| Somalia               | mixed        | 7,266,202   | 0.23%* | 16,712    | 72%* | 2.49%* | \$0.55   |
| South Africa          | mixed        | 36,753,491  | 0.21%  | 77,182    | 48%* | 0.70%  | \$6.70   |
| South Korea           | concentrated | 37,364,822  | 0.23%* | 85,939    | 82%  | 0.50%  | \$34.97  |
| South Sudan           | mixed        | 6,685,064   | 0.23%* | 15,376    | 72%* | 2.49%* | \$2.27*  |
| Spain^^               | concentrated | 30,705,410  | 0.03%  | 9,212     | 56%  | 0.60%  | \$33.80  |
| Sri Lanka             | mixed        | 13,997,712  | 0.01%  | 1,400     | 3%   | 0.51%* | \$4.87   |
| Sudan                 | mixed        | 21,900,668  | 0.23%* | 50,372    | 61%  | 2.49%* | \$3.07   |
| Suriname              | concentrated | 371,347     | 0.42%* | 1,560     | 68%* | 0.75%* | \$7.46   |
| Swaziland             | mixed        | 798,701     | 0.10%* | 799       | 89%  | 0.95%* | \$3.52   |
| Sweden                | concentrated | 6,228,380   | 0.13%  | 8,097     | 75%  | 0.40%  | \$65.83  |
| Switzerland^^         | concentrated | 5,604,694   | 0.24%  | 13,451    | 72%  | 0.92%  | \$101.44 |
| Syria                 | mixed        | 10,773,905  | 0.23%* | 24,780    | 61%  | 3.00%  | \$7.26*  |
| Tajikistan            | mixed        | 5,367,478   | 0.45%  | 24,154    | 45%  | 1.34%* | \$1.01   |
| Timor-Leste           | mixed        | 669,094     | 0.01%  | 67        | 57%* | 0.51%* | \$1.78   |
| Thailand              | mixed        | 49,164,792  | 0.11%  | 54,081    | 90%  | 0.70%  | \$7.51   |
| Togo                  | mixed        | 4,210,790   | 0.06%  | 2,526     | 31%  | 0.95%* | \$0.73   |

|                             |              |             |        |           |      |        |          |
|-----------------------------|--------------|-------------|--------|-----------|------|--------|----------|
| Tonga                       | concentrated | 61,991      | 0.23%* | 143       | 48%* | 0.74%* | \$4.76   |
| Trinidad and Tobago         | concentrated | 949,398     | 0.42%* | 3,987     | 68%* | 0.75%* | \$20.37  |
| Tunisia                     | mixed        | 7,790,140   | 0.23%* | 17,917    | 22%  | 0.90%  | \$4.68   |
| Turkey                      | concentrated | 53,061,615  | 0.66%* | 350,207   | 53%  | 0.60%  | \$13.79  |
| Turkmenistan                | concentrated | 3,681,434   | 0.66%* | 24,297    | 52%  | 1.34%* | \$8.11   |
| Uganda                      | mixed        | 20,678,765  | 0.10%* | 20,679    | 48%* | 0.95%* | \$0.74   |
| Ukraine                     | concentrated | 30,875,921  | 0.97%  | 299,496   | 67%  | 1.34%* | \$2.78   |
| United Arab Emirates        | mixed        | 7,881,775   | 0.23%* | 18,128    | 72%* | 1.30%  | \$47.77  |
| United Kingdom^^            | concentrated | 42,001,358  | 0.59%  | 247,808   | 53%  | 0.27%  | \$51.32  |
| United Republic of Tanzania | concentrated | 28,790,340  | 1.24%  | 357,000   | 48%* | 0.95%* | \$1.11   |
| United States of America    | concentrated | 213,071,223 | 1.04%  | 2,215,941 | 53%  | 0.90%  | \$73.19  |
| Uruguay                     | mixed        | 2,211,820   | 0.30%  | 6,635     | 22%  | 0.75%* | \$19.33  |
| Uzbekistan                  | mixed        | 21,558,308  | 0.47%  | 101,324   | 78%  | 4.30%  | \$2.68   |
| Vanuatu                     | concentrated | 161,124     | 0.23%* | 371       | 85%  | 0.74%* | \$3.63   |
| Venezuela                   | concentrated | 20,731,567  | 0.42%* | 87,073    | 30%  | 0.40%  | \$12.70* |
| Vietnam                     | mixed        | 66,197,535  | 0.25%  | 165,494   | 6%   | 1.10%  | \$2.76   |
| Yemen                       | mixed        | 15,681,743  | 0.23%* | 36,068    | 28%  | 0.80%  | \$1.26   |
| Zambia                      | mixed        | 8,696,624   | 0.10%* | 8,697     | 52%  | 0.95%* | \$1.61   |
| Zimbabwe                    | mixed        | 9,012,715   | 0.10%* | 9,013     | 27%  | 0.95%* | \$1.31   |

\* WHO regional estimate.

^^ In 2018 these countries were identified as the 12 that were on track to achieve elimination by 2030<sup>4</sup>. Therefore updated prevalence estimates were generated for PWID and the general community by subtracting the 2016 and 2017 treatment numbers<sup>4</sup> from the estimated number of people with hepatitis C (assuming PWID were equally likely to be treated as members of the general community).

# Scott et al. 2018<sup>5</sup>; pre-elimination program estimate.

<sup>a</sup> Epidemics were classified as generalised, meaning that infection was possible among the general population as well as among PWID, if the country was not in a WHO high income classification AND the total number of people living with hepatitis C was >5 times the total number of estimated hepatitis C-infected PWID. This was done as without transmission among the general population, the model was unable to produce the correct number of people living with hepatitis C based on injecting drug use-related transmission alone.

<sup>b</sup> UN Population Division<sup>6</sup>; 15-64 years (2016).

<sup>c</sup> Degenhardt et al.<sup>1</sup>. For countries without estimates, WHO region values were applied<sup>7</sup>.

<sup>d</sup> Estimated based on prevalence of injecting drug use.

<sup>e</sup> Degenhardt et al.<sup>1</sup> For countries without estimates, population-weighted averages were calculated for each WHO region and applied.

<sup>f</sup> Blach et al.<sup>2</sup> and Gower et al.<sup>3</sup> For countries without estimates, population-weighted averages were calculated for each WHO region and applied.

<sup>g</sup> Average salary calculated as the per capita gross domestic product (GDP); from World Bank data<sup>8</sup>. Costs assume two hours of provider time for interaction and any laboratory work, and that providers work 7 hours per day, 5 days per week and 45 weeks per year.

## APPENDIX B: SPECIFIC COUNTRY CASE STUDIES

### Summary inputs

Table S2: Example model input parameters for five country case studies. Data for all 167 countries are in the supplement Table S1.

| Country                                       | Australia           | Brazil               | China       | Egypt               | United States of America |
|-----------------------------------------------|---------------------|----------------------|-------------|---------------------|--------------------------|
| Total adult population                        | 15,942,528          | 144,560,447          | 995,072,896 | 58,789,880          | 213,071,223              |
| Percentage of the population who inject drugs | 0.60%               | 0.1% <sup>9</sup>    | 0.25%       | 0.23%               | 1.04%                    |
| Total number of PWID                          | 95,655              | 144,560              | 2,487,682   | 135,217             | 2,215,941                |
| Epidemic type                                 | concentrated        | concentrated         | mixed       | mixed               | concentrated             |
| Prevalence among PWID                         | 39.6% <sup>^^</sup> | 26% <sup>10,11</sup> | 43.1%       | 35.0% <sup>^^</sup> | 53.1%                    |
| Prevalence among the general population       | 0.7% <sup>^^</sup>  | 0.7% <sup>12</sup>   | 0.7%        | 4.46% <sup>^^</sup> | 0.9%                     |
| Staff costs associated with each interaction  | US\$63.18           | US\$10.98            | US\$10.32   | US\$4.42            | US\$73.19                |

<sup>^^</sup> In 2018 these countries were identified as being among 12 that were on track to achieve elimination by 2030<sup>4</sup>. Therefore updated prevalence estimates were generated for PWID and the general community by subtracting the 2016 and 2017 treatment numbers<sup>4</sup> from the estimated number of people with hepatitis C (assuming PWID were equally likely to be treated as members of the general community).

### Selecting the optimal strategy

The optimal WHO incidence reduction target strategies for each country with and without a vaccine available were chosen as follows, with five examples illustrated in Figures S5-S9.

First, all combinations of interventions without a vaccine were run and considered in the cost-effectiveness plane of total cost versus cumulative cases averted, 2018-2030. Specifically, test/treat programs for PWID [testing two-yearly, annually or six-monthly] with and without testing of the general community. Scenarios were considered dominated if they cost more but prevented fewer cumulative cases than another scenario, and dominated scenario were excluded from further consideration. Among the non-dominated scenario, the optimal WHO target strategy was considered to be the one that achieved an 80% reduction in incidence by 2030 in the most cost-effective way (as measured by cost per incident case averted). Where no scenario could achieve this level of incidence reduction, the non-dominated scenario with the greatest 2030 incidence reduction was selected.

This process was then repeated with a broader set of interventions that included the availability of a vaccine. Specifically, all combinations of test/treat programs for PWID [testing two-yearly, annually or six-monthly] with and without vaccination included; testing of the general community with and without vaccination included; and an adolescent vaccination program. Again the optimal WHO target strategy was considered to be the non-dominated scenario that was the most cost effective



for achieving an 80% reduction in incidence by 2030, or where this was not possible the non-dominated scenario that achieved the greatest 2030 incidence reduction.

As Australia, Brazil and USA were classified as having concentrated epidemics, the general community interventions are suppressed from those figures below. For China and Egypt, a log10 scale is used on the cost axis. In China, without a vaccine we see that the general community testing (squares) were only slightly more effective but much more expensive than PWID only testing (circles), and dominated by PWID only testing + vaccination (diamonds).

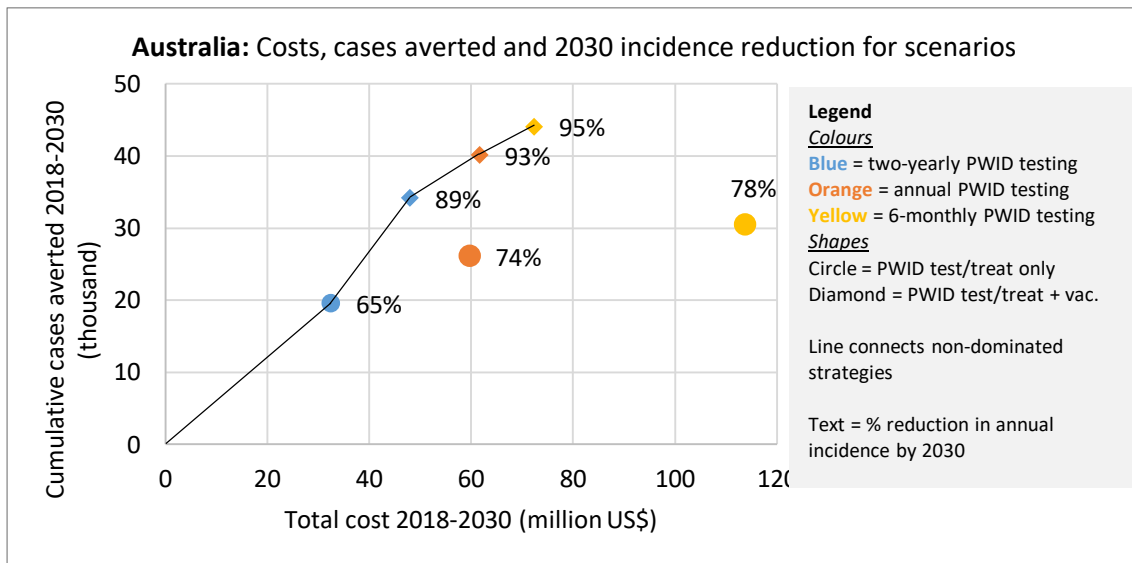

**Figure S5: Selecting the optimal strategy for Australia.** Without a vaccine (only circles considered), 6-monthly testing of PWID (yellow circle; 78% incidence reduction by 2030) was selected as the non-dominated optimal WHO target strategy. With a vaccine available, the most cost-effective way to reach an 80% reduction in incidence was a two-yearly test/treat/vaccinate program for PWID (blue diamond). Vaccine was assumed to have 75% efficacy, 10-year duration of protection and cost US\$200/course.

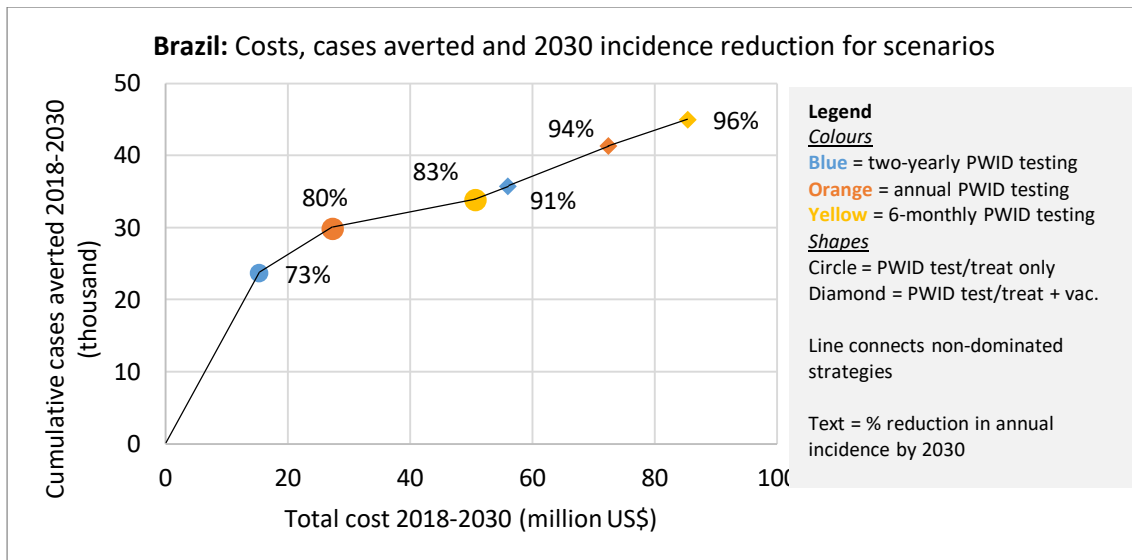

**Figure S6: Selecting the optimal strategy for Brazil.** With or without a vaccine, annual testing of PWID was the most cost-effective and non-dominated way to achieve an 80% reduction in incidence by 2030 (orange circle). Vaccine was assumed to have 75% efficacy, 10-year duration of protection and cost US\$200/course.

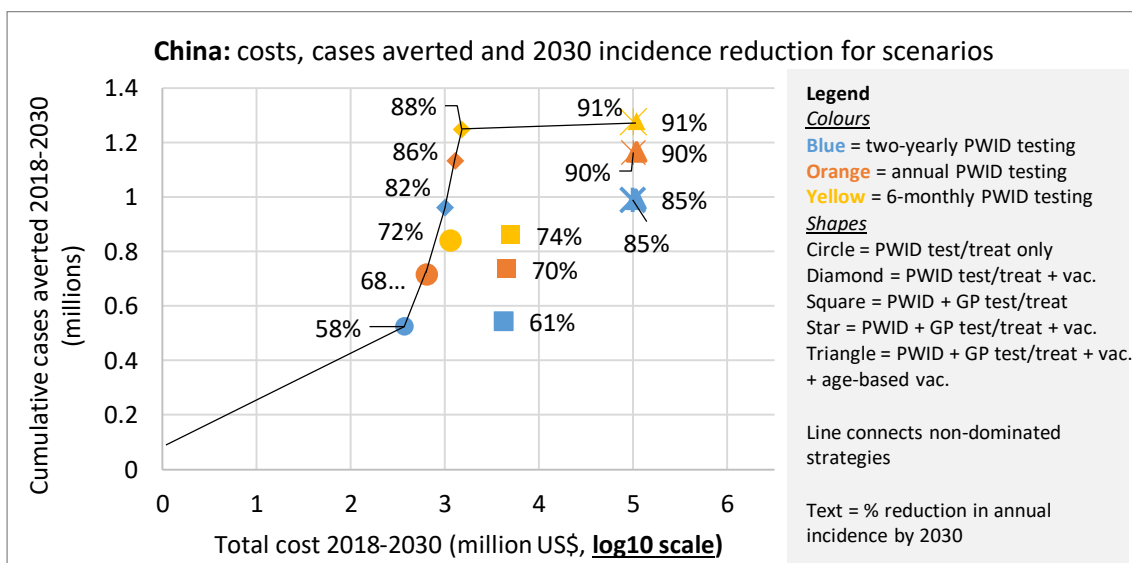

**Figure S7: Selecting the optimal strategy for China.** Without a vaccine (only circles and squares considered), 6-monthly testing of PWID + general population screening (yellow square; 74% reduction in incidence by 2030) was selected as the optimal WHO target strategy. With a vaccine available, the most cost-effective way to reach an 80% reduction in incidence was a two-yearly test/treat/vaccinate program for PWID (blue diamond). Vaccine was assumed to have 75% efficacy, 10-year duration of protection and cost US\$200/course.

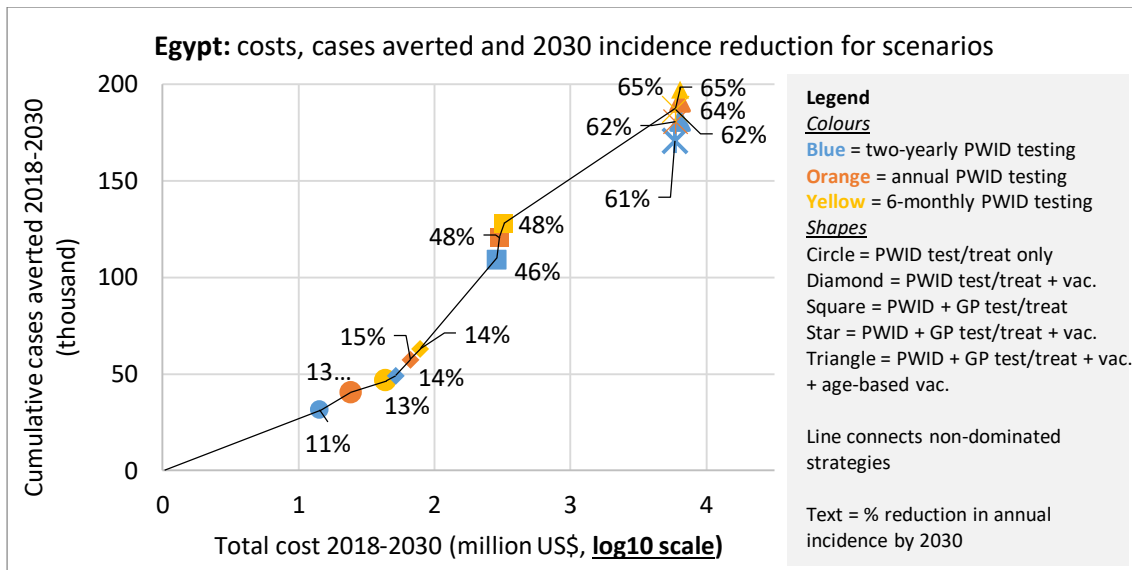

**Figure S8: Selecting the optimal strategy for Egypt.** Without a vaccine (only circles and squares considered), 6-monthly testing of PWID + general population screening (yellow square; 48% reduction in incidence by 2030) was selected as the optimal WHO target strategy. With a vaccine available, a 64% reduction in incidence by 2030 was the greatest non-dominated strategy, using two-yearly test/treat/vaccinate program for PWID and screening of the general population (without vaccination) (blue star). Vaccine was assumed to have 75% efficacy, 10-year duration of protection and cost US\$200/course.

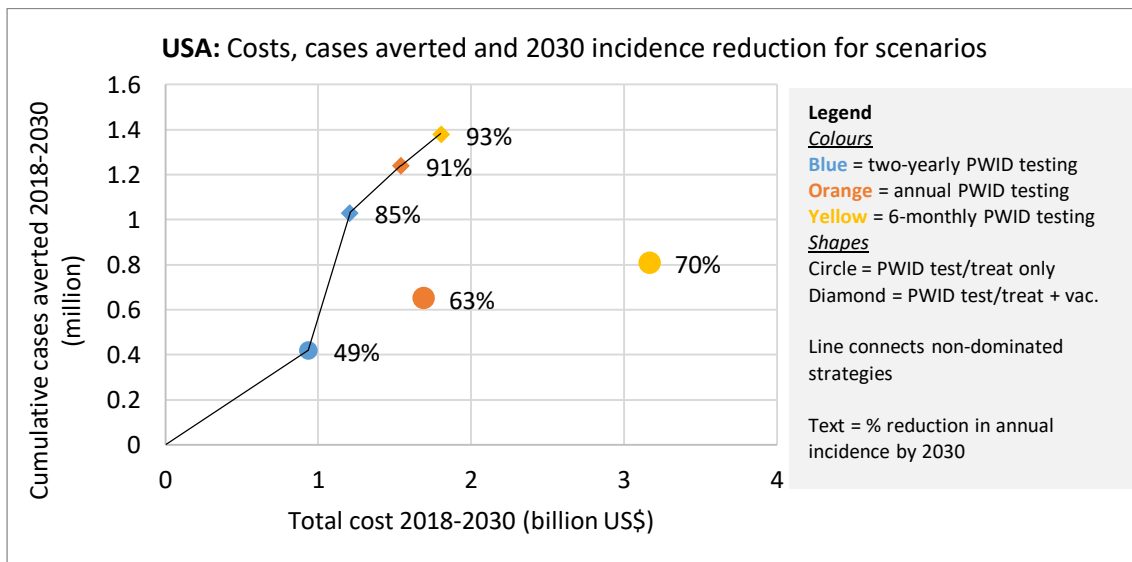

**Figure S9: Selecting the optimal strategy for USA.** Without a vaccine (only circles considered), 6-monthly testing of PWID (yellow circle; 70% incidence reduction by 2030) was selected as the optimal WHO target strategy. With a vaccine available, the most cost-effective way to reach an 80% reduction in incidence was a two-yearly test/treat/vaccinate program for PWID (blue diamond). Vaccine was assumed to have 75% efficacy, 10-year duration of protection and cost US\$200/course.

### Impact of a vaccine

Assuming 80% health care coverage, the availability of a 75% efficacious vaccine as a possible intervention for an elimination strategy led to an additional 16%, 13%, 20% and 25% of cases averted between 2018 and 2030 in Australia, China, Egypt and the USA, respectively, but no difference for Brazil as it did not form part of the optimal WHO target strategy in that setting (see Figure S6). With a 75% efficacious vaccine, testing requirements among PWID became more feasible, with testing requirements among PWID reduced from 6-monthly to two-yearly in Australia, China and the USA.

Availability of a vaccine could lead to different optimal strategies for reaching the WHO target. For China, the optimal strategy without a vaccine included screening of the general community, whereas the additional impact of a vaccine (even if only 50% efficacious) meant that it became possible to reduce incidence by 80% through targeted programs for PWID alone, which was considerably cheaper (Figure S10).

A US\$200 per course 75% efficacious vaccine reduced the total costs of the optimal incidence reduction programs in Australia, China and the USA by US\$66 million (58%), US\$4.0 billion (80%) and US\$2.0 billion (62%), respectively. For Egypt, unless the vaccine was under US\$2.46 per course, the optimal strategy with a vaccine resulted in higher total costs, due to the large-scale vaccine delivery required through the age-based vaccination program and the general population screening program.

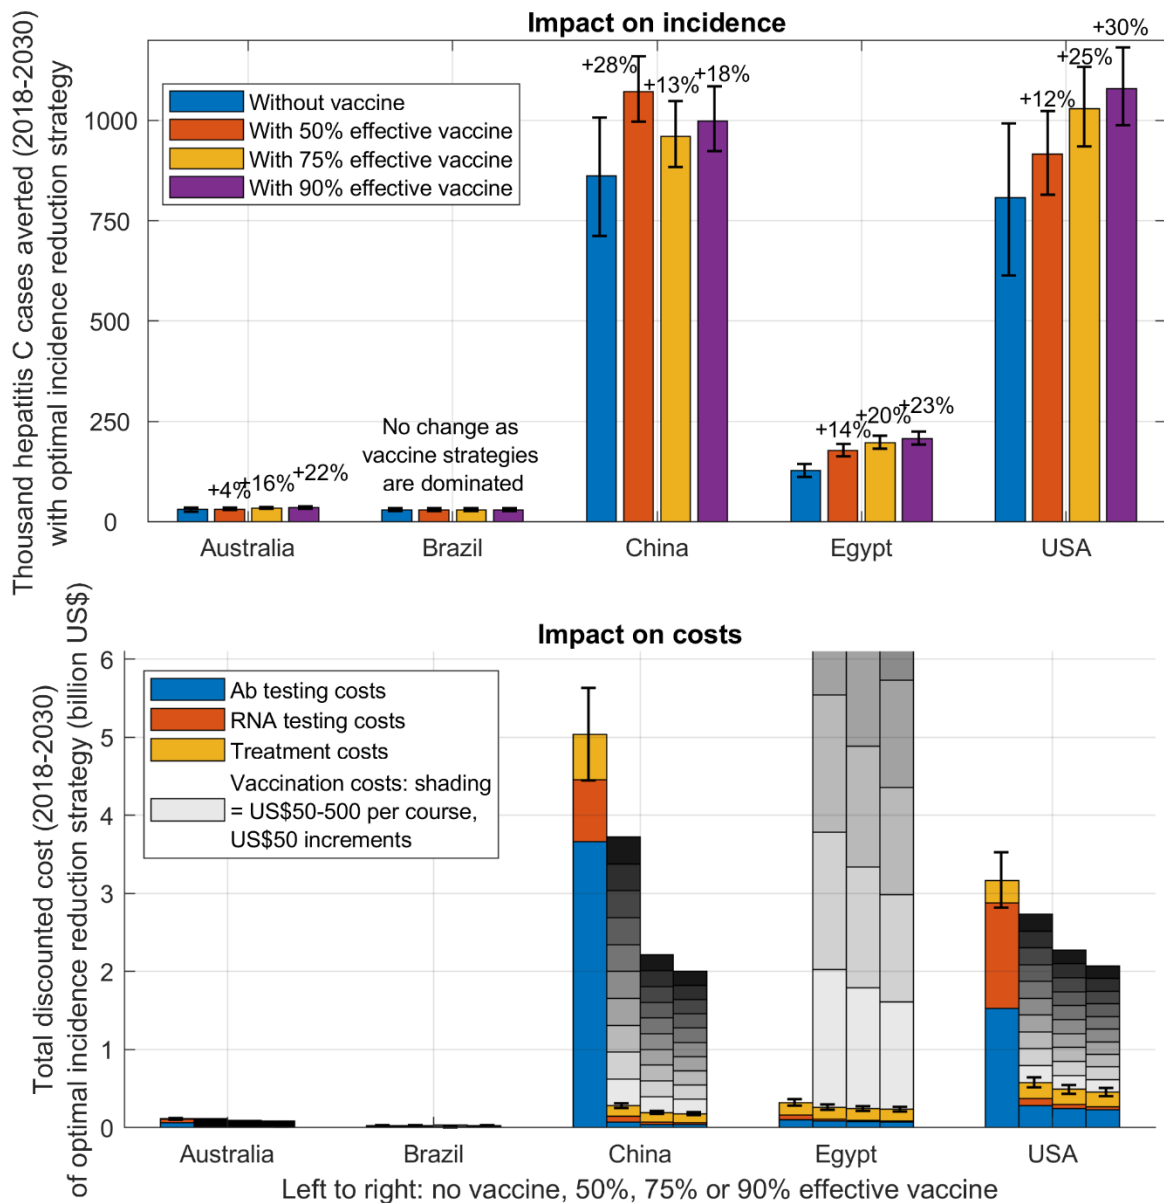

**Figure S10: Potential impact of a hepatitis C vaccine in Australia, Brazil, China, Egypt and the USA.** Top panel: cumulative cases averted 2018-2030 using the optimal strategy without a vaccine (blue) and with a 50%, 75% or 90% efficacious vaccine (red, yellow and purple, respectively). Bottom panel: total discounted costs of the optimal incidence reduction strategy without a vaccine (left bars) and with a 50%, 75% or 90% efficacious vaccine (right bars). Lightest grey shading represents total vaccination costs at US\$50 per vaccine course, with darker shadings representing total costs as the vaccine price per course increases in US\$50 increments. Uncertainty bounds represent scenarios with 70% and 90% coverage of testing, treatment and vaccination compared to a base of 80%.

## APPENDIX C: GENERAL SETTINGS

### Settings considered

Independent models were run for settings with concentrated epidemics (25%, 50% or 75% hepatitis C prevalence among PWID), generalised epidemics (1%, 2%, 3%, 5%, 10%, 15%, 25% or 30% hepatitis C prevalence among the general community) and mixed epidemics (all combinations of hepatitis C prevalence among PWID and the general community). Parameters used for these settings are shown in Table S3.

**Table S3: Parameters for the general settings considered**

| <i>Characteristics of sample settings to be tested (all combinations of the below)</i> |                                      |                                                                                                                                                                                                                                                                                         |
|----------------------------------------------------------------------------------------|--------------------------------------|-----------------------------------------------------------------------------------------------------------------------------------------------------------------------------------------------------------------------------------------------------------------------------------------|
| Proportion of the population who inject drugs                                          | 0.24%                                | Global average from Global Hepatitis Report <sup>7</sup> .                                                                                                                                                                                                                              |
| Additional injecting-related mortality                                                 | 0.0235 per year                      | Mathers et al. systematic review <sup>13</sup>                                                                                                                                                                                                                                          |
| Epidemic type                                                                          | Concentrated/<br>generalised / mixed | In concentrated epidemic settings only transmission among PWID was modelled; in generalised epidemic settings only transmission among the general community was modelled; and in mixed epidemic settings transmission among PWID and the general community was modelled.                |
| Prevalence among PWID                                                                  | 25/50/75%                            |                                                                                                                                                                                                                                                                                         |
| Prevalence in general population                                                       | 1/2/3/5/10/15/20/<br>25/30%          |                                                                                                                                                                                                                                                                                         |
| Healthcare system coverage                                                             | 70/80/90%                            | This parameter defines the coverage of testing / vaccination that could be achieved, and is used to derive uncertainty bounds for outcomes                                                                                                                                              |
| Staffing cost per interaction (testing+/-vaccination and treatment)                    | US\$11.34                            | Global average, based on two hours of provider time for interaction and any laboratory work. Average salary calculated as the population-weighted per capita gross domestic product (GDP) <sup>8</sup> . Assumes providers work 7 hours per day, 5 days per week and 45 weeks per year. |

### Results

Availability of a 75% efficacious vaccine had the potential to substantially improve the impact of incidence reduction strategies, with the greatest benefits in settings with higher initial prevalence (Figure S11).

If a 75% efficacious vaccine cost US\$200 per course, the vaccine strategies dominated the non-vaccine strategies in medium and high prevalence concentrated epidemic settings (i.e. cost less and prevented more incident cases) and were included within the optimal test/treat strategies for PWID.

In these settings, the optimal incidence reduction strategies with a vaccine available required 32% and 52% fewer treatments than the optimal strategies without the vaccine, respectively (Table S5).

In low, medium and high prevalence concentrated epidemic settings, the vaccine strategies dominated the non-vaccine strategies provided a vaccine course cost under US\$77, US\$263 or US\$236 per course, respectively (Figure S11).

In generalised epidemic settings, the optimal incidence reduction strategy without a vaccine was screening and treatment of the general community, and the optimal strategy with a vaccine was to deliver vaccination with the general community screening program as well as through an age-based program (Table S4). The incidence reduction target was not able to be reached in generalised epidemic settings (unless testing levels among the general community were unfeasibly high, such as having annual testing of the entire population rather than having the entire population screened by 2030). However, use of a vaccine was able to approximately double the achievable incidence reduction in these settings.

For generalised epidemic settings with initial prevalence in the general community under 3%, 10%, 20% or 30%, unless the vaccine was under US\$2.00, US\$2.91, US\$4.31, US\$5.86 per course, respectively, use of a vaccine resulted in higher total costs. This is because the large-scale vaccine delivery was not entirely offset by the reduced treatment requirements.

In mixed epidemic settings, the optimal strategies included targeted programs for PWID, as well as programs among the general community, as per the concentrated and generalised epidemic settings.

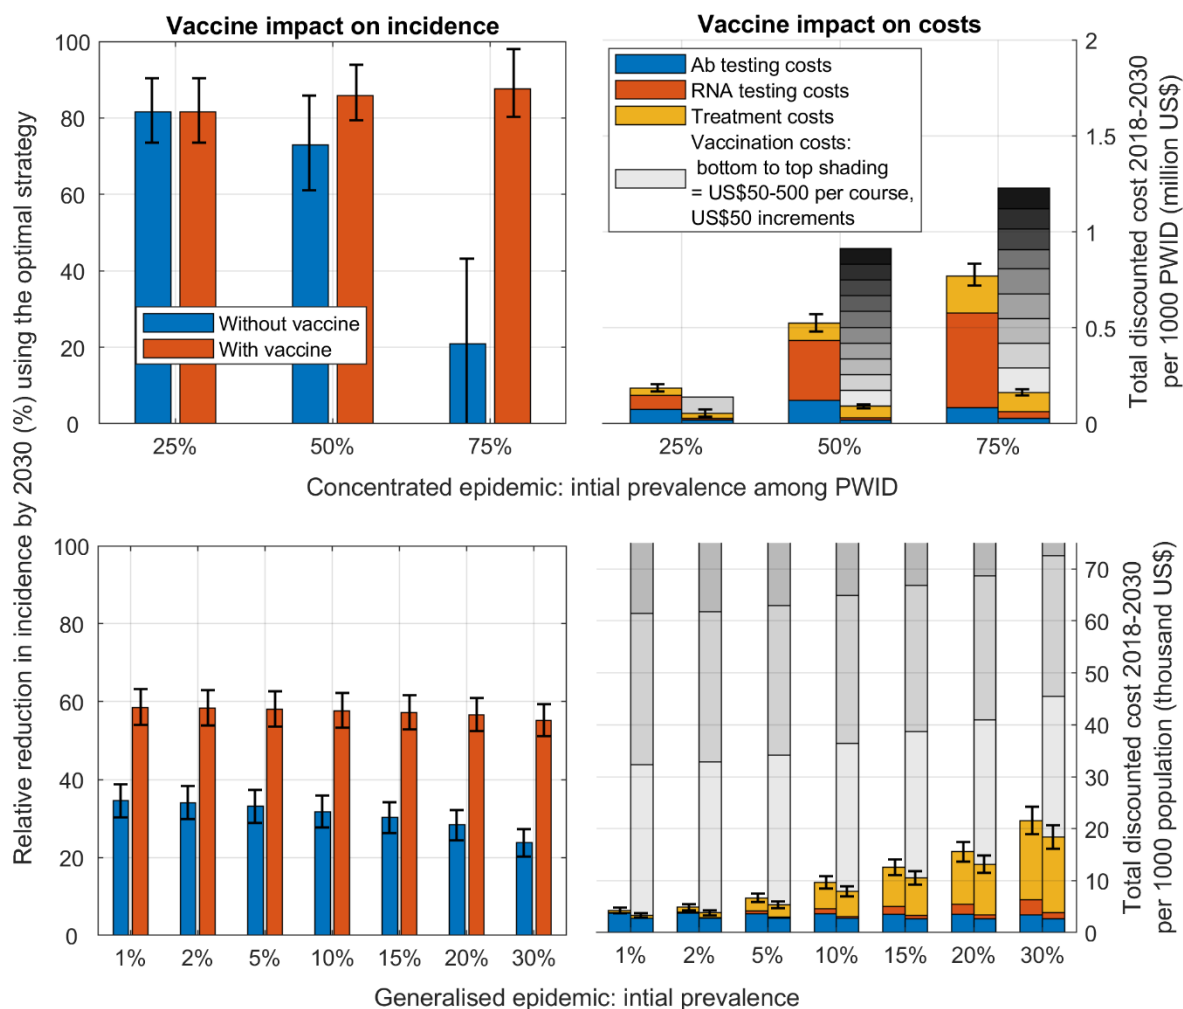

**Figure S11: Potential impact of a 75% efficacious hepatitis C vaccine on incidence reduction strategies in concentrated and generalised epidemic settings.** Left panels: incidence reduction in 2030 under the optimal incidence reduction strategies without a vaccine (blue bars) and with a 75% efficacious vaccine (red bars). Right panels: total discounted costs of the optimal incidence reduction strategies without a vaccine (left bars) and with a 75% efficacious vaccine available (right bars). Lightest grey shading represents total vaccination costs at US\$50 per vaccine course, with darker shadings representing total costs as the vaccine price per course increases in US\$50 increments. Uncertainty bounds represent scenarios with 70% and 90% coverage of testing, treatment and vaccination compared to a base of 80%.

**Table S4: The optimal strategy to reduce incidence of hepatitis C by 2030 considering impact and cost per 1000 PWID for each of the settings.**

| Epidemic type | Prevalence among PWID | Prevalence among the general population | Optimal strategy: with a vaccine | Optimal strategy: no vaccine | Incidence reduction with vaccine <sup>^</sup> | Incidence reduction without vaccine <sup>^</sup> | Cost per 1000 target population* with US\$200 vaccine (thousand US\$) <sup>^</sup> | Cost per 1000 target population* without vaccine (thousand US\$) <sup>^</sup> |
|---------------|-----------------------|-----------------------------------------|----------------------------------|------------------------------|-----------------------------------------------|--------------------------------------------------|------------------------------------------------------------------------------------|-------------------------------------------------------------------------------|
| Concentrated  | 25                    | N/A                                     | Same as non-vaccine strategy     | Annual PWID testing          | 82 (73, 90)                                   | 82 (73, 90)                                      | \$186 (\$166, \$204)                                                               | \$186 (\$166, \$204)                                                          |



|              |     |      |                                                                       |                                               |                   |                   |                             |                         |
|--------------|-----|------|-----------------------------------------------------------------------|-----------------------------------------------|-------------------|-------------------|-----------------------------|-------------------------|
| Concentrated | 50  | N/A  | 2-yearly PWID testing + vaccination                                   | 6-monthly PWID testing                        | 86<br>(78, 92)    | 73<br>(60, 85)    | \$420<br>(\$368, \$471)     | \$523<br>(\$475, \$566) |
| Concentrated | 75  | N/A  | 6-monthly PWID testing + vaccination                                  | 6-monthly PWID testing                        | 88<br>(77, 95)    | 21<br>(-1, 49)    | \$677<br>(\$595, \$759)     | \$769<br>(\$705, \$818) |
| Generalised  | N/A | 1-10 | General pop. testing +vaccination +Age vaccination                    | General pop. testing                          | 58-59<br>(53, 63) | 34-35<br>(29, 39) | \$120-122<br>(\$108, \$134) | \$4-10<br>(\$4, \$11)   |
| Generalised  | N/A | 15   | General pop. testing +vaccination +Age vaccination                    | General pop. testing                          | 57<br>(53, 61)    | 30<br>(26, 34)    | \$123<br>(\$111, \$135)     | \$13<br>(\$11, \$14)    |
| Generalised  | N/A | 20   | General pop. testing +vaccination +Age vaccination                    | General pop. testing                          | 57<br>(52, 61)    | 28<br>(25, 32)    | \$124<br>(\$112, \$136)     | \$16<br>(\$14, \$17)    |
| Generalised  | N/A | 30   | General pop. testing +vaccination +Age vaccination                    | General pop. testing                          | 55<br>(51, 59)    | 24<br>(20, 27)    | \$127<br>(\$114, \$139)     | \$22<br>(\$19, \$24)    |
| Mixed        | 25  | 1    | 6-monthly PWID testing + general pop. testing + vaccination + Age vac | 6-monthly PWID testing + general pop. testing | 73<br>(68, 77)    | 56<br>(50, 62)    | \$121<br>(\$109, \$133)     | \$5<br>(\$5, \$6)       |
| Mixed        | 50  | 1    | 6-monthly PWID testing + general pop. testing + vaccination + Age vac | 6-monthly PWID testing + general pop. testing | 78<br>(73, 83)    | 60<br>(52, 69)    | \$121<br>(\$109, \$133)     | \$6<br>(\$5, \$6)       |
| Mixed        | 75  | 1    | 6-monthly PWID testing + general pop. testing + vaccination + Age vac | 6-monthly PWID testing + general pop. testing | 79<br>(69, 86)    | 34<br>(18, 53)    | \$121<br>(\$109, \$133)     | \$6<br>(\$6, \$7)       |
| Mixed        | 25  | 2-5  | 6-monthly PWID testing + general pop. testing + vaccination + Age vac | 6-monthly PWID testing + general pop. testing | 65-68<br>(60, 71) | 45-50<br>(39, 55) | \$121-123<br>(\$110, \$135) | \$6-8<br>(\$5, \$9)     |
| Mixed        | 50  | 2-5  | 6-monthly PWID testing + general pop. testing + vaccination + Age vac | 6-monthly PWID testing + general pop. testing | 67-72<br>(62, 77) | 46-53<br>(40, 60) | \$121-123<br>(\$110, \$135) | \$6-9<br>(\$6, \$10)    |
| Mixed        | 75  | 2-5  | 6-monthly PWID testing + general pop. testing + vaccination + Age vac | 6-monthly PWID testing + general pop. testing | 68-73<br>(61, 79) | 39-40<br>(27, 52) | \$122-123<br>(\$110, \$135) | \$7-9<br>(\$6, \$10)    |
| Mixed        | 25  | 10   | 6-monthly PWID testing + general pop. testing + vaccination + Age vac | 6-monthly PWID testing + general pop. testing | 64<br>(59, 68)    | 41<br>(36, 47)    | \$126<br>(\$113, \$138)     | \$12<br>(\$10, \$13)    |
| Mixed        | 50  | 10   | 6-monthly PWID testing + general pop. testing + vaccination + Age vac | 6-monthly PWID testing + general pop. testing | 65<br>(60, 69)    | 42<br>(37, 48)    | \$126<br>(\$113, \$138)     | \$12<br>(\$11, \$14)    |
| Mixed        | 75  | 10   | 6-monthly PWID testing + general pop. testing + vaccination + Age vac | 6-monthly PWID testing + general pop. testing | 65<br>(59, 70)    | 39<br>(33, 47)    | \$126<br>(\$113, \$138)     | \$13<br>(\$11, \$14)    |

\*For concentrated epidemic settings, results are per 1000 PWID. For generalised and mixed epidemic settings, results are per 1000 population. Mixed epidemic settings assume 0.24% of the population injects drugs (see Table S3).

^Uncertainty bounds represent scenarios with 70% and 90% population coverage of testing, treatment and vaccination compared to a base of 80%.

**Table S5: Total treatments, Ab tests, RNA tests and vaccinations required in each setting.** Confidence intervals represent scenarios with 70% and 90% population coverage of testing, treatment and vaccination compared to a base of 80%. For concentrated epidemic settings, results are per 1000 PWID. For generalised and mixed epidemic settings, results are per 1000 population. Mixed epidemic settings assume 0.24% of the population injects drugs (see Table S3).

| Epidemic type | Prevalence among PWID | Prevalence among the general population | Optimal strategy: with a vaccination                                  | Optimal strategy: no vaccination              | Total treatments with vaccine | Total treatments without vaccine | Total Ab tests with vaccine | Total Ab tests without vaccine | Total RNA tests with vaccine | Total RNA tests without vaccine | Total vaccinations      |
|---------------|-----------------------|-----------------------------------------|-----------------------------------------------------------------------|-----------------------------------------------|-------------------------------|----------------------------------|-----------------------------|--------------------------------|------------------------------|---------------------------------|-------------------------|
| Concentrated  | 25                    | N/A                                     | Same as non-vaccine strategy                                          | Annual PWID testing                           | 269<br>(252, 281)             | 269<br>(252, 281)                | 7,741<br>(6,722, 8,775)     | 7,741<br>(6,722, 8,775)        | 1,141<br>(1,035, 1,236)      | 1,141<br>(1,035, 1,236)         | 0                       |
| Concentrated  | 50                    | N/A                                     | 2-yearly PWID testing + vaccination                                   | 6-monthly PWID testing                        | 425<br>(385, 463)             | 627<br>(611, 629)                | 1,900<br>(1,658, 2,143)     | 12,462<br>(10,606, 14,410)     | 202<br>(180, 224)            | 4,878<br>(4,474, 5,215)         | 2,054<br>(1,793, 2,316) |
| Concentrated  | 75                    | N/A                                     | 6-monthly PWID testing + vaccination                                  | 6-monthly PWID testing                        | 677<br>(619, 730)             | 1,416<br>(1,413, 1,350)          | 2,683<br>(2,333, 3,036)     | 8,563<br>(7,018, 10,371)       | 529<br>(473, 581)            | 7,734<br>(7,016, 8,289)         | 3,150<br>(2,748, 3,552) |
| Generalised   | N/A                   | 1                                       | general pop. testing + vaccination +Age vac                           | general pop. testing                          | 4<br>(3, 4)                   | 4<br>(3, 4)                      | 278<br>(243, 313)           | 378<br>(331, 425)              | 1<br>(1, 1)                  | 2<br>(1, 2)                     | 728<br>(658, 799)       |
| Generalised   | N/A                   | 2                                       | general pop. testing + vaccination +Age vac                           | general pop. testing                          | 8<br>(7, 8)                   | 8<br>(7, 9)                      | 277<br>(242, 312)           | 377<br>(330, 424)              | 1<br>(1, 1)                  | 3<br>(3, 4)                     | 727<br>(657, 797)       |
| Generalised   | N/A                   | 3                                       | general pop. testing + vaccination +Age vac                           | general pop. testing                          | 11<br>(10, 13)                | 12<br>(10, 13)                   | 277<br>(242, 312)           | 376<br>(329, 423)              | 2<br>(2, 2)                  | 5<br>(4, 6)                     | 725<br>(655, 795)       |
| Generalised   | N/A                   | 5                                       | general pop. testing + vaccination +Age vac                           | general pop. testing                          | 19<br>(16, 21)                | 19<br>(17, 22)                   | 276<br>(241, 311)           | 373<br>(327, 420)              | 3<br>(3, 4)                  | 8<br>(7, 9)                     | 721<br>(652, 791)       |
| Generalised   | N/A                   | 10                                      | general pop. testing + vaccination +Age vac                           | general pop. testing                          | 38<br>(33, 42)                | 39<br>(34, 44)                   | 273<br>(239, 308)           | 367<br>(321, 413)              | 6<br>(6, 7)                  | 17<br>(14, 19)                  | 713<br>(645, 782)       |
| Generalised   | N/A                   | 15                                      | general pop. testing + vaccination +Age vac                           | general pop. testing                          | 56<br>(49, 63)                | 58<br>(51, 66)                   | 271<br>(237, 305)           | 361<br>(316, 406)              | 10<br>(9, 11)                | 25<br>(22, 28)                  | 705<br>(638, 772)       |
| Generalised   | N/A                   | 20                                      | general pop. testing + vaccination +Age vac                           | general pop. testing                          | 75<br>(66, 84)                | 78<br>(69, 88)                   | 268<br>(235, 303)           | 355<br>(311, 400)              | 13<br>(11, 15)               | 33<br>(29, 37)                  | 697<br>(630, 763)       |
| Generalised   | N/A                   | 30                                      | general pop. testing + vaccination +Age vac                           | general pop. testing                          | 113<br>(99, 127)              | 118<br>(103, 132)                | 264<br>(230, 297)           | 343<br>(300, 386)              | 19<br>(17, 22)               | 49<br>(43, 56)                  | 680<br>(616, 744)       |
| Mixed         | 25                    | 1                                       | 6-monthly PWID testing + general pop. testing + vaccination + Age vac | 6-monthly PWID testing + general pop. testing | 5<br>(4, 6)                   | 5<br>(5, 6)                      | 284<br>(248, 320)           | 414<br>(362, 466)              | 1<br>(1, 1)                  | 8<br>(7, 9)                     | 734<br>(663, 805)       |
| Mixed         | 50                    | 1                                       | 6-monthly PWID testing + general pop. testing + vaccination + Age vac | 6-monthly PWID testing + general pop. testing | 5<br>(5, 6)                   | 6<br>(5, 7)                      | 284<br>(248, 320)           | 407<br>(355, 459)              | 2<br>(1, 2)                  | 14<br>(13, 15)                  | 734<br>(663, 805)       |

|       |    |    |                                                                       |                                               |                |                |                   |                   |              |                |                   |
|-------|----|----|-----------------------------------------------------------------------|-----------------------------------------------|----------------|----------------|-------------------|-------------------|--------------|----------------|-------------------|
| Mixed | 75 | 1  | 6-monthly PWID testing + general pop. testing + vaccination + age vac | 6-monthly PWID testing + general pop. testing | 6<br>(5, 7)    | 8<br>(7, 8)    | 283<br>(247, 319) | 398<br>(347, 449) | 2<br>(2, 2)  | 21<br>(19, 22) | 734<br>(663, 805) |
| Mixed | 25 | 2  | 6-monthly PWID testing + general pop. testing + vaccination + age vac | 6-monthly PWID testing + general pop. testing | 10<br>(8, 11)  | 10<br>(9, 11)  | 284<br>(248, 320) | 413<br>(361, 465) | 2<br>(2, 2)  | 10<br>(9, 11)  | 733<br>(662, 805) |
| Mixed | 50 | 2  | 6-monthly PWID testing + general pop. testing + vaccination + age vac | 6-monthly PWID testing + general pop. testing | 10<br>(9, 11)  | 11<br>(10, 12) | 283<br>(247, 319) | 406<br>(354, 458) | 2<br>(2, 3)  | 16<br>(14, 17) | 733<br>(662, 804) |
| Mixed | 75 | 2  | 6-monthly PWID testing + general pop. testing + vaccination + age vac | 6-monthly PWID testing + general pop. testing | 11<br>(9, 12)  | 13<br>(11, 14) | 283<br>(247, 319) | 396<br>(346, 448) | 3<br>(3, 3)  | 23<br>(21, 25) | 733<br>(662, 804) |
| Mixed | 25 | 3  | 6-monthly PWID testing + general pop. testing + vaccination + age vac | 6-monthly PWID testing + general pop. testing | 14<br>(13, 16) | 15<br>(13, 17) | 283<br>(247, 319) | 412<br>(360, 464) | 3<br>(2, 3)  | 12<br>(11, 13) | 733<br>(662, 804) |
| Mixed | 50 | 3  | 6-monthly PWID testing + general pop. testing + vaccination + age vac | 6-monthly PWID testing + general pop. testing | 15<br>(13, 16) | 16<br>(14, 17) | 283<br>(247, 319) | 405<br>(353, 456) | 3<br>(3, 4)  | 18<br>(16, 20) | 733<br>(662, 804) |
| Mixed | 75 | 3  | 6-monthly PWID testing + general pop. testing + vaccination + age vac | 6-monthly PWID testing + general pop. testing | 15<br>(13, 17) | 17<br>(16, 19) | 282<br>(246, 318) | 395<br>(345, 446) | 4<br>(3, 4)  | 25<br>(22, 27) | 732<br>(662, 804) |
| Mixed | 25 | 5  | 6-monthly PWID testing + general pop. testing + vaccination + age vac | 6-monthly PWID testing + general pop. testing | 24<br>(21, 26) | 24<br>(21, 27) | 282<br>(247, 318) | 409<br>(358, 461) | 4<br>(4, 5)  | 16<br>(14, 18) | 731<br>(661, 802) |
| Mixed | 50 | 5  | 6-monthly PWID testing + general pop. testing + vaccination + age vac | 6-monthly PWID testing + general pop. testing | 24<br>(21, 27) | 25<br>(22, 28) | 282<br>(246, 318) | 402<br>(351, 453) | 5<br>(4, 5)  | 22<br>(20, 24) | 731<br>(660, 802) |
| Mixed | 75 | 5  | 6-monthly PWID testing + general pop. testing + vaccination + age vac | 6-monthly PWID testing + general pop. testing | 24<br>(21, 27) | 27<br>(24, 30) | 281<br>(246, 317) | 393<br>(343, 444) | 5<br>(5, 6)  | 29<br>(26, 32) | 731<br>(660, 802) |
| Mixed | 25 | 10 | 6-monthly PWID testing + general pop. testing + vaccination + age vac | 6-monthly PWID testing + general pop. testing | 47<br>(41, 52) | 48<br>(43, 54) | 280<br>(244, 315) | 403<br>(353, 454) | 8<br>(7, 9)  | 26<br>(23, 29) | 728<br>(658, 799) |
| Mixed | 50 | 10 | 6-monthly PWID testing + general pop. testing + vaccination + age vac | 6-monthly PWID testing + general pop. testing | 47<br>(41, 53) | 49<br>(43, 55) | 279<br>(244, 315) | 396<br>(346, 447) | 9<br>(8, 10) | 32<br>(29, 35) | 728<br>(658, 798) |
| Mixed | 75 | 10 | 6-monthly PWID testing + general pop. testing + vaccination + age vac | 6-monthly PWID testing + general pop. testing | 48<br>(42, 53) | 51<br>(45, 56) | 279<br>(243, 314) | 387<br>(337, 437) | 9<br>(8, 10) | 39<br>(35, 43) | 728<br>(657, 798) |

## APPENDIX D: SENSITIVITY ANALYSIS

When the vaccine efficacy was halved (37.5%) for individuals following successful treatment, the price per course had to be 2-20% cheaper in order to reduce the cost of elimination, but the optimal strategies were unchanged. This assumption had a much smaller impact on outcomes than the overall efficacy of the vaccine because the majority of vaccinations were delivered to uninfected people. For example, if the vaccine were 90% efficacious rather than 75%, the price point for the vaccine to reduce the costs of elimination was relaxed by 12-45%, whereas if the vaccine were only 50% efficacious, the price per course had to be 20-45% cheaper in order to reduce the cost of elimination (Table S6).

If no staff costs were included, meaning that the human resources associated with testing and treating to achieve eliminating were accounted for elsewhere, then the cost of a vaccine would have to be 20-46% cheaper in concentrated epidemic settings or 39-85% cheaper in generalised epidemic settings to reduce overall costs.

If the vaccine duration of protection was 5 years or 100 years (i.e. lifetime) compared to 10 years, then the price point was lowered by 13-26% (meaning the vaccine needed to be cheaper to save costs) or increased by 20-41% across the different prevalence settings, respectively.

Harm reduction scale-up only altered the optimal strategy in settings with low (<25%) prevalence among PWID: with a 60% scale-up of harm reduction, two-yearly testing rather than annual testing of PWID was sufficient to achieve the incidence reduction target in these settings. This meant that a vaccine did not reduce costs by as much and so had to be cheaper per course to reduce the cost of elimination. Scaling up harm reduction by 20%, 40% or 60% in non-vaccine scenarios meant that in settings with approximately 50% prevalence among PWID, the achievable incidence reduction increased from 73% to 75%, 76%, and 77% respectively, and in settings with approximately 75% prevalence among PWID the achievable incidence reduction increased from 21% to 26%, 30% and 35%.

Variations in the time between antibody test and RNA test, retention in care following a positive antibody test, and the time between RNA tests and treatment commencement had minimal impact of outcomes (Table S6).

**Table S6: The price point at which a vaccine would reduce the cost of elimination under a variety of alternate assumptions.** Vaccine is modelled to be 75% efficacious with a 10-year duration of protection, and be delivered with hepatitis C testing and following successful treatment. Results from mixed settings are not shown as they are similar to the results of concentrated + generalised.

| Scenario | Concentrated epidemic settings  |                                 |                                 | Generalised epidemic settings                      |                                                       |                                                        |
|----------|---------------------------------|---------------------------------|---------------------------------|----------------------------------------------------|-------------------------------------------------------|--------------------------------------------------------|
|          | 25%<br>prevalence<br>among PWID | 50%<br>prevalence<br>among PWID | 75%<br>prevalence<br>among PWID | 1% prevalence<br>among the<br>general<br>community | 5%<br>prevalence<br>among the<br>general<br>community | 10%<br>prevalence<br>among the<br>general<br>community |
| Baseline | \$77                            | \$263                           | \$236                           | \$1.75                                             | \$3.59                                                | \$4.31                                                 |

|                                                                                |             |              |              |               |               |               |
|--------------------------------------------------------------------------------|-------------|--------------|--------------|---------------|---------------|---------------|
| 20% scale up of harm reduction among PWID                                      | \$76 (-1%)  | \$259 (-1%)  | \$283 (20%)  | \$1.75 (0%)   | \$3.59 (0%)   | \$4.31 (0%)   |
| 40% scale up of harm reduction among PWID                                      | \$75 (-3%)  | \$260 (-1%)  | \$279 (18%)  | \$1.75 (0%)   | \$3.59 (0%)   | \$4.31 (0%)   |
| 60% scale up of harm reduction among PWID                                      | \$27 (-65%) | \$266 (1%)   | \$281 (19%)  | \$1.75 (0%)   | \$3.59 (0%)   | \$4.31 (0%)   |
| 90% efficacious vaccine rather than 75%                                        | \$88 (14%)  | \$294 (12%)  | \$335 (42%)  | \$2.54 (45%)  | \$5.2 (45%)   | \$6.25 (45%)  |
| 50% efficacious vaccine rather than 75%                                        | \$59 (-23%) | \$210 (-20%) | \$160 (-32%) | \$0.96 (-45%) | \$2.01 (-44%) | \$2.42 (-44%) |
| Vaccine 50% less efficacious following successful treatment                    | \$73 (-5%)  | \$244 (-7%)  | \$209 (-11%) | \$1.71 (-2%)  | \$2.96 (-18%) | \$3.44 (-20%) |
| No staff costs                                                                 | \$42 (-46%) | \$180 (-32%) | \$189 (-20%) | \$0.26 (-85%) | \$1.95 (-46%) | \$2.62 (-39%) |
| Double staff costs                                                             | \$113 (46%) | \$346 (32%)  | \$283 (20%)  | \$3.25 (86%)  | \$5.22 (45%)  | \$5.99 (39%)  |
| 5 years duration of protection                                                 | \$66 (-15%) | \$229 (-13%) | \$183 (-22%) | \$1.3 (-26%)  | \$2.7 (-25%)  | \$3.25 (-25%) |
| 100 years duration of protection                                               | \$95 (23%)  | \$315 (20%)  | \$319 (35%)  | \$2.47 (41%)  | \$4.98 (39%)  | \$5.96 (38%)  |
| 90 days between Ab and RNA tests rather than 60 days                           | \$77 (0%)   | \$263 (0%)   | \$236 (0%)   | \$1.75 (0%)   | \$3.59 (0%)   | \$4.31 (0%)   |
| Ab test and RNA test occurring on the same day (+100% follow-up)               | \$77 (0%)   | \$259 (-1%)  | \$569 (142%) | \$1.78 (2%)   | \$4.04 (13%)  | \$4.89 (13%)  |
| Average 60 days from diagnosis to treatment commencement rather than 30 days   | \$77 (0%)   | \$262 (0%)   | \$235 (0%)   | \$1.75 (0%)   | \$3.59 (0%)   | \$4.31 (0%)   |
| 70% follow-up RNA testing rather than 80%                                      | \$77 (0%)   | \$264 (1%)   | \$235 (0%)   | \$1.74 (-1%)  | \$3.38 (-6%)  | \$4.03 (-6%)  |
| Half the testing positivity rate for the general community (testing at random) | \$77 (0%)   | \$262 (0%)   | \$235 (0%)   | \$3.38 (93%)  | \$5.1 (42%)   | \$5.77 (34%)  |

## APPENDIX E: COUNTRY SPECIFIC RESULTS

Table S7: Summary of country specific model estimates. Full results in Table S8 below.

| Outcome                                                                  | Without vaccine     |                             | With vaccine        |                              |
|--------------------------------------------------------------------------|---------------------|-----------------------------|---------------------|------------------------------|
|                                                                          | Number of countries | Percentage                  | Number of countries | Percentage                   |
| Optimal testing strategy among PWID (number of countries and percentage) |                     |                             |                     |                              |
| <i>2-year</i>                                                            | 0                   | 0%                          | 47                  | 28%                          |
| <i>1-year</i>                                                            | 4                   | 2%                          | 26                  | 16%                          |
| <i>6-month</i>                                                           | 144                 | 86%                         | 94                  | 56%                          |
| Countries where a vaccine reduced the testing frequency among PWID       | N/A                 | N/A                         | 69                  | 41%                          |
| Countries where 80% reduction is achievable                              | 8 (0-48)            | 5% (0-29%)                  | 94 (15-113)         | 56% (9-68%)                  |
| Median incidence reduction by 2030                                       | 55%                 | (Range: 0-83%; IQR: 46-70%) | 81%                 | (Range: 60-90%; IQR: 73-86%) |
| Price point for a vaccine to reduce the cost of elimination              |                     |                             |                     |                              |
| <i>Concentrated epidemic</i>                                             | N/A                 | N/A                         | \$247               | (IQR: \$204-442)             |
| <i>Mixed epidemic</i>                                                    | N/A                 | N/A                         | \$1.36              | (IQR: \$0.94-3.04)           |

Table S8: Country specific model estimates. Subregions: AFRO=Africa; EMRO=Eastern Mediterranean; EURO=Europe; PAHO=Americas; SEARO=South-East Asia; WPRO=Western Pacific.

| Country                                                                                   | Cases averted with vaccine strategy compared to non-vaccine strategy | Optimal strategy: with a vaccine | Optimal strategy: no vaccine | Incidence reduction with vaccine | Incidence reduction without vaccine | Price point for a vaccine to save costs (US\$0) | Cost with US\$200 vaccine (million US\$0) | Cost without vaccine (million US\$0) | Difference in total cost (million US\$0) |
|-------------------------------------------------------------------------------------------|----------------------------------------------------------------------|----------------------------------|------------------------------|----------------------------------|-------------------------------------|-------------------------------------------------|-------------------------------------------|--------------------------------------|------------------------------------------|
| AFRO region, sorted by additional cases that could be averted if a vaccine were available |                                                                      |                                  |                              |                                  |                                     |                                                 |                                           |                                      |                                          |

|                                        |                            |                                                                        |                                        |                |                |          |                                 |                         |                                    |
|----------------------------------------|----------------------------|------------------------------------------------------------------------|----------------------------------------|----------------|----------------|----------|---------------------------------|-------------------------|------------------------------------|
| Nigeria                                | 53,156<br>(49,885, 54,858) | 6-monthly PWID testing + GP testing<br>+ vaccination + age vaccination | 6-monthly PWID<br>testing + GP testing | 68<br>(63, 73) | 51<br>(44, 58) | \$1.27   | \$10,797<br>(\$9,632, \$11,964) | \$248<br>(\$219, \$277) | -\$10,549<br>(-\$11,686, -\$9,413) |
| United Republic<br>of Tanzania         | 24,895<br>(12,300, 34,942) | 2-yearly PWID testing + vaccination                                    | 6-monthly PWID<br>testing              | 87<br>(79, 93) | 74<br>(61, 85) | \$189.01 | \$139<br>(\$122, \$156)         | \$133<br>(\$122, \$143) | -\$6<br>(-\$14, \$0)               |
| Mozambique                             | 19,032<br>(15,399, 21,057) | 6-monthly PWID testing + GP testing<br>+ vaccination                   | 6-monthly PWID<br>testing + GP testing | 84<br>(73, 91) | 38<br>(19, 60) | \$2.25   | \$1,465<br>(\$1,280, \$1,651)   | \$34<br>(\$31, \$37)    | -\$1,431<br>(-\$1,614, -\$1,250)   |
| South Africa                           | 18,552<br>(15,269, 20,814) | 6-monthly PWID testing + GP testing<br>+ vaccination                   | 6-monthly PWID<br>testing + GP testing | 83<br>(77, 87) | 67<br>(56, 76) | \$2.56   | \$3,663<br>(\$3,199, \$4,129)   | \$138<br>(\$122, \$153) | -\$3,525<br>(-\$3,976, -\$3,078)   |
| Ethiopia                               | 15,119<br>(12,845, 16,654) | 6-monthly PWID testing + GP testing<br>+ vaccination + age vaccination | 6-monthly PWID<br>testing + GP testing | 79<br>(73, 83) | 62<br>(53, 71) | \$0.89   | \$6,011<br>(\$5,344, \$6,679)   | \$78<br>(\$69, \$86)    | -\$5,933<br>(-\$6,593, -\$5,275)   |
| Ghana                                  | 10,513<br>(9,136, 11,301)  | 6-monthly PWID testing + GP testing<br>+ vaccination + age vaccination | 6-monthly PWID<br>testing + GP testing | 71<br>(64, 77) | 48<br>(38, 59) | \$1.40   | \$1,736<br>(\$1,543, \$1,930)   | \$39<br>(\$35, \$44)    | -\$1,697<br>(-\$1,887, -\$1,508)   |
| Algeria                                | 9,275<br>(8,300, 9,883)    | 6-monthly PWID testing + GP testing<br>+ vaccination + age vaccination | 6-monthly PWID<br>testing + GP testing | 72<br>(67, 77) | 56<br>(48, 64) | \$1.56   | \$2,826<br>(\$2,512, \$3,141)   | \$77<br>(\$68, \$87)    | -\$2,749<br>(-\$3,054, -\$2,444)   |
| Democratic<br>Republic of the<br>Congo | 9,172<br>(9,023, 9,172)    | 6-monthly PWID testing + GP testing<br>+ vaccination + age vaccination | 6-monthly PWID<br>testing + GP testing | 63<br>(57, 68) | 46<br>(40, 52) | \$0.68   | \$4,226<br>(\$3,757, \$4,697)   | \$69<br>(\$61, \$78)    | -\$4,157<br>(-\$4,619, -\$3,696)   |
| Uganda                                 | 7,961<br>(7,186, 8,439)    | 6-monthly PWID testing + GP testing<br>+ vaccination + age vaccination | 6-monthly PWID<br>testing + GP testing | 72<br>(66, 77) | 55<br>(48, 63) | \$0.91   | \$2,227<br>(\$1,985, \$2,470)   | \$32<br>(\$29, \$36)    | -\$2,195<br>(-\$2,434, -\$1,956)   |
| Angola                                 | 5,087<br>(4,541, 5,429)    | 6-monthly PWID testing + GP testing<br>+ vaccination + age vaccination | 6-monthly PWID<br>testing + GP testing | 73<br>(67, 77) | 56<br>(48, 64) | \$1.44   | \$1,565<br>(\$1,392, \$1,739)   | \$39<br>(\$34, \$43)    | -\$1,527<br>(-\$1,696, -\$1,358)   |
| Burkina Faso                           | 4,206<br>(3,872, 4,396)    | 6-monthly PWID testing + GP testing<br>+ vaccination + age vaccination | 6-monthly PWID<br>testing + GP testing | 70<br>(64, 75) | 53<br>(46, 60) | \$0.98   | \$1,038<br>(\$924, \$1,153)     | \$18<br>(\$16, \$20)    | -\$1,021<br>(-\$1,134, -\$908)     |
| Cameroon                               | 3,941<br>(3,440, 4,270)    | 6-monthly PWID testing + GP testing<br>+ vaccination + age vaccination | 6-monthly PWID<br>testing + GP testing | 76<br>(70, 80) | 59<br>(50, 67) | \$1.03   | \$1,358<br>(\$1,209, \$1,507)   | \$22<br>(\$19, \$24)    | -\$1,336<br>(-\$1,483, -\$1,190)   |
| Chad                                   | 3,776<br>(3,511, 3,926)    | 6-monthly PWID testing + GP testing<br>+ vaccination + age vaccination | 6-monthly PWID<br>testing + GP testing | 70<br>(64, 75) | 53<br>(45, 60) | \$0.93   | \$802<br>(\$718, \$886)         | \$12<br>(\$11, \$14)    | -\$790<br>(-\$873, -\$707)         |
| Zambia                                 | 3,672<br>(3,268, 3,923)    | 6-monthly PWID testing + GP testing<br>+ vaccination + age vaccination | 6-monthly PWID<br>testing + GP testing | 73<br>(67, 77) | 55<br>(47, 63) | \$1.09   | \$939<br>(\$837, \$1,042)       | \$16<br>(\$14, \$18)    | -\$923<br>(-\$1,023, -\$823)       |
| Niger                                  | 3,426<br>(3,062, 3,655)    | 6-monthly PWID testing + GP testing<br>+ vaccination + age vaccination | 6-monthly PWID<br>testing + GP testing | 73<br>(67, 77) | 56<br>(48, 64) | \$0.88   | \$1,039<br>(\$924, \$1,153)     | \$14<br>(\$13, \$16)    | -\$1,024<br>(-\$1,137, -\$911)     |
| Mali                                   | 3,129<br>(2,795, 3,338)    | 6-monthly PWID testing + GP testing<br>+ vaccination + age vaccination | 6-monthly PWID<br>testing + GP testing | 73<br>(67, 77) | 56<br>(48, 64) | \$0.96   | \$951<br>(\$846, \$1,057)       | \$15<br>(\$13, \$16)    | -\$937<br>(-\$1,040, -\$833)       |
| Senegal                                | 2,930<br>(2,619, 3,125)    | 6-monthly PWID testing + GP testing<br>+ vaccination + age vaccination | 6-monthly PWID<br>testing + GP testing | 73<br>(67, 77) | 56<br>(48, 64) | \$0.99   | \$887<br>(\$789, \$985)         | \$14<br>(\$13, \$16)    | -\$873<br>(-\$970, -\$777)         |
| Kenya                                  | 2,887<br>(1,524, 3,961)    | 2-yearly PWID testing + vaccination                                    | 6-monthly PWID<br>testing              | 85<br>(77, 92) | 71<br>(58, 83) | \$209.06 | \$13<br>(\$11, \$15)            | \$13<br>(\$12, \$14)    | \$0<br>(\$0, \$1)                  |
| Zimbabwe                               | 2,808<br>(2,727, 2,830)    | 6-monthly PWID testing + GP testing<br>+ vaccination + age vaccination | 6-monthly PWID<br>testing + GP testing | 68<br>(62, 72) | 52<br>(46, 58) | \$0.76   | \$979<br>(\$873, \$1,084)       | \$14<br>(\$13, \$16)    | -\$964<br>(-\$1,068, -\$861)       |

|                       |                         |                                                                     |                                     |                |                |          |                               |                      |                                  |
|-----------------------|-------------------------|---------------------------------------------------------------------|-------------------------------------|----------------|----------------|----------|-------------------------------|----------------------|----------------------------------|
| Malawi                | 2,774<br>(2,701, 2,790) | 6-monthly PWID testing + GP testing + vaccination + age vaccination | 6-monthly PWID testing + GP testing | 67<br>(62, 72) | 52<br>(46, 57) | \$0.61   | \$1,028<br>(\$916, \$1,139)   | \$12<br>(\$11, \$14) | -\$1,015<br>(-\$1,126, -\$905)   |
| Ivory Coast           | 2,580<br>(2,477, 2,650) | 6-monthly PWID testing + GP testing + vaccination + age vaccination | 6-monthly PWID testing + GP testing | 61<br>(56, 66) | 44<br>(39, 50) | \$0.57   | \$1,362<br>(\$1,210, \$1,515) | \$21<br>(\$18, \$23) | -\$1,342<br>(-\$1,492, -\$1,192) |
| Guinea                | 2,440<br>(2,188, 2,597) | 6-monthly PWID testing + GP testing + vaccination + age vaccination | 6-monthly PWID testing + GP testing | 72<br>(67, 77) | 56<br>(48, 63) | \$0.93   | \$721<br>(\$642, \$801)       | \$11<br>(\$10, \$12) | -\$710<br>(-\$789, -\$632)       |
| Burundi               | 2,395<br>(2,189, 2,518) | 6-monthly PWID testing + GP testing + vaccination + age vaccination | 6-monthly PWID testing + GP testing | 71<br>(65, 76) | 54<br>(47, 61) | \$0.85   | \$602<br>(\$538, \$667)       | \$8<br>(\$7, \$9)    | -\$594<br>(-\$658, -\$530)       |
| Gabon                 | 2,321<br>(2,264, 2,321) | 6-monthly PWID testing + GP testing + vaccination + age vaccination | 6-monthly PWID testing + GP testing | 62<br>(56, 67) | 42<br>(35, 49) | \$3.39   | \$131<br>(\$116, \$146)       | \$10<br>(\$9, \$12)  | -\$121<br>(-\$134, -\$107)       |
| Benin                 | 2,160<br>(1,941, 2,296) | 6-monthly PWID testing + GP testing + vaccination + age vaccination | 6-monthly PWID testing + GP testing | 72<br>(67, 77) | 56<br>(48, 63) | \$0.95   | \$628<br>(\$559, \$697)       | \$10<br>(\$9, \$11)  | -\$618<br>(-\$686, -\$551)       |
| Rwanda                | 1,815<br>(1,782, 1,815) | 6-monthly PWID testing + GP testing + vaccination + age vaccination | 6-monthly PWID testing + GP testing | 64<br>(59, 69) | 47<br>(41, 53) | \$0.55   | \$720<br>(\$641, \$799)       | \$9<br>(\$8, \$10)   | -\$711<br>(-\$789, -\$633)       |
| Liberia               | 1,162<br>(1,066, 1,220) | 6-monthly PWID testing + GP testing + vaccination + age vaccination | 6-monthly PWID testing + GP testing | 71<br>(66, 76) | 54<br>(47, 61) | \$0.87   | \$279<br>(\$250, \$308)       | \$4<br>(\$3, \$4)    | -\$275<br>(-\$304, -\$246)       |
| Mauritania            | 1,046<br>(954, 1,102)   | 6-monthly PWID testing + GP testing + vaccination + age vaccination | 6-monthly PWID testing + GP testing | 71<br>(66, 76) | 55<br>(47, 62) | \$1.00   | \$267<br>(\$239, \$296)       | \$4<br>(\$4, \$5)    | -\$263<br>(-\$291, -\$235)       |
| Togo                  | 1,043<br>(1,024, 1,043) | 6-monthly PWID testing + GP testing + vaccination + age vaccination | 6-monthly PWID testing + GP testing | 66<br>(60, 71) | 50<br>(44, 56) | \$0.58   | \$447<br>(\$398, \$497)       | \$6<br>(\$5, \$6)    | -\$442<br>(-\$491, -\$393)       |
| Sierra Leone          | 1,001<br>(958, 1,017)   | 6-monthly PWID testing + GP testing + vaccination + age vaccination | 6-monthly PWID testing + GP testing | 66<br>(60, 71) | 49<br>(43, 56) | \$0.58   | \$429<br>(\$381, \$477)       | \$5<br>(\$5, \$6)    | -\$423<br>(-\$471, -\$376)       |
| Republic of the Congo | 945<br>(841, 1,010)     | 6-monthly PWID testing + GP testing + vaccination + age vaccination | 6-monthly PWID testing + GP testing | 73<br>(67, 78) | 56<br>(48, 64) | \$2.62   | \$302<br>(\$269, \$336)       | \$14<br>(\$13, \$16) | -\$288<br>(-\$320, -\$256)       |
| Swaziland             | 799<br>(682, 904)       | 6-monthly PWID testing + GP testing + vaccination + age vaccination | GP testing                          | 70<br>(58, 80) | 13<br>(12, 15) | \$0.21   | \$86<br>(\$76, \$95)          | \$2<br>(\$1, \$2)    | -\$84<br>(-\$94, -\$75)          |
| Madagascar            | 631<br>(605, 650)       | 6-monthly PWID testing + GP testing + vaccination + age vaccination | 6-monthly PWID testing + GP testing | 62<br>(57, 67) | 45<br>(40, 51) | \$0.28   | \$1,481<br>(\$1,318, \$1,644) | \$9<br>(\$8, \$10)   | -\$1,472<br>(-\$1,634, -\$1,310) |
| Namibia               | 567<br>(511, 601)       | 6-monthly PWID testing + GP testing + vaccination + age vaccination | 6-monthly PWID testing + GP testing | 72<br>(66, 77) | 55<br>(48, 63) | \$1.64   | \$161<br>(\$143, \$178)       | \$5<br>(\$4, \$5)    | -\$156<br>(-\$173, -\$139)       |
| Botswana              | 497<br>(443, 531)       | 6-monthly PWID testing + GP testing + vaccination + age vaccination | 6-monthly PWID testing + GP testing | 73<br>(67, 78) | 56<br>(48, 64) | \$2.13   | \$157<br>(\$139, \$174)       | \$6<br>(\$5, \$7)    | -\$151<br>(-\$168, -\$134)       |
| Mauritius             | 490<br>(242, 689)       | 2-yearly PWID testing + vaccination                                 | 6-monthly PWID testing              | 87<br>(79, 93) | 74<br>(61, 85) | \$271.02 | \$3<br>(\$3, \$3)             | \$4<br>(\$3, \$4)    | \$1<br>(\$1, \$1)                |
| Lesotho               | 464<br>(414, 495)       | 6-monthly PWID testing + GP testing + vaccination + age vaccination | 6-monthly PWID testing + GP testing | 73<br>(67, 77) | 56<br>(48, 64) | \$1.01   | \$141<br>(\$125, \$157)       | \$2<br>(\$2, \$3)    | -\$139<br>(-\$154, -\$123)       |
| Guinea-Bissau         | 426<br>(388, 449)       | 6-monthly PWID testing + GP testing + vaccination + age vaccination | 6-monthly PWID testing + GP testing | 71<br>(66, 76) | 55<br>(47, 62) | \$0.91   | \$110<br>(\$98, \$122)        | \$2<br>(\$1, \$2)    | -\$108<br>(-\$120, -\$97)        |
| Gambia                | 368<br>(327, 395)       | 6-monthly PWID testing + GP testing + vaccination + age vaccination | 6-monthly PWID testing + GP testing | 74<br>(68, 78) | 57<br>(49, 65) | \$0.87   | \$114<br>(\$102, \$127)       | \$2<br>(\$1, \$2)    | -\$113<br>(-\$125, -\$101)       |



|                                                                                           |                               |                                                                     |                                     |                |                |          |                                  |                         |                                     |
|-------------------------------------------------------------------------------------------|-------------------------------|---------------------------------------------------------------------|-------------------------------------|----------------|----------------|----------|----------------------------------|-------------------------|-------------------------------------|
| Equatorial Guinea                                                                         | 260<br>(232, 277)             | 6-monthly PWID testing + GP testing + vaccination + age vaccination | 6-monthly PWID testing + GP testing | 73<br>(67, 77) | 56<br>(48, 64) | \$2.47   | \$80<br>(\$71, \$88)             | \$4<br>(\$3, \$4)       | -\$76<br>(-\$85, -\$68)             |
| Eritrea                                                                                   | 171<br>(84, 240)              | 2-yearly PWID testing + vaccination                                 | 6-monthly PWID testing              | 87<br>(79, 93) | 74<br>(61, 85) | \$195.50 | \$1<br>(\$1, \$1)                | \$1<br>(\$1, \$1)       | \$0<br>(\$0, \$0)                   |
| Central African Republic                                                                  | 167<br>(83, 235)              | 2-yearly PWID testing + vaccination                                 | 6-monthly PWID testing              | 87<br>(79, 93) | 73<br>(61, 85) | \$185.59 | \$1<br>(\$1, \$1)                | \$1<br>(\$1, \$1)       | \$0<br>(\$0, \$0)                   |
| Comoros                                                                                   | 159<br>(142, 170)             | 6-monthly PWID testing + GP testing + vaccination + age vaccination | 6-monthly PWID testing + GP testing | 73<br>(67, 77) | 56<br>(48, 64) | \$0.96   | \$48<br>(\$43, \$54)             | \$1<br>(\$1, \$1)       | -\$48<br>(-\$53, -\$42)             |
| EMRO region, sorted by additional cases that could be averted if a vaccine were available |                               |                                                                     |                                     |                |                |          |                                  |                         |                                     |
| Pakistan                                                                                  | 435,128<br>(374,684, 488,308) | 6-monthly PWID testing + GP testing + vaccination + age vaccination | GP testing                          | 70<br>(59, 80) | 14<br>(12, 15) | **       | \$12,786<br>(\$11,362, \$14,214) | \$351<br>(\$308, \$395) | -\$12,435<br>(-\$13,818, -\$11,054) |
| Egypt                                                                                     | 69,543<br>(68,380, 69,543)    | 6-monthly PWID testing + GP testing + vaccination + age vaccination | 6-monthly PWID testing + GP testing | 65<br>(59, 70) | 48<br>(42, 54) | \$2.46   | \$6,434<br>(\$5,718, \$7,152)    | \$324<br>(\$285, \$362) | -\$6,111<br>(-\$6,790, -\$5,433)    |
| Sudan                                                                                     | 26,343<br>(22,804, 28,493)    | 6-monthly PWID testing + GP testing + vaccination + age vaccination | 6-monthly PWID testing + GP testing | 73<br>(67, 78) | 52<br>(42, 62) | \$2.65   | \$2,373<br>(\$2,109, \$2,636)    | \$90<br>(\$80, \$100)   | -\$2,282<br>(-\$2,536, -\$2,029)    |
| Morocco                                                                                   | 21,096<br>(17,348, 23,145)    | 6-monthly PWID testing + GP testing + vaccination + age vaccination | 6-monthly PWID testing + GP testing | 79<br>(70, 86) | 40<br>(23, 59) | \$1.95   | \$2,511<br>(\$2,236, \$2,787)    | \$65<br>(\$58, \$72)    | -\$2,447<br>(-\$2,715, -\$2,179)    |
| Somalia                                                                                   | 13,584<br>(11,564, 14,642)    | 6-monthly PWID testing + GP testing + vaccination + age vaccination | 6-monthly PWID testing + GP testing | 73<br>(65, 79) | 42<br>(29, 56) | \$2.58   | \$789<br>(\$702, \$875)          | \$26<br>(\$23, \$28)    | -\$763<br>(-\$847, -\$679)          |
| Syria                                                                                     | 13,010<br>(11,390, 13,979)    | 6-monthly PWID testing + GP testing + vaccination + age vaccination | 6-monthly PWID testing + GP testing | 72<br>(65, 77) | 51<br>(42, 61) | \$3.46   | \$1,171<br>(\$1,039, \$1,303)    | \$64<br>(\$56, \$71)    | -\$1,107<br>(-\$1,232, -\$983)      |
| South Sudan                                                                               | 12,361<br>(10,507, 13,335)    | 6-monthly PWID testing + GP testing + vaccination + age vaccination | 6-monthly PWID testing + GP testing | 73<br>(65, 79) | 41<br>(29, 56) | \$2.89   | \$727<br>(\$647, \$807)          | \$27<br>(\$24, \$30)    | -\$699<br>(-\$777, -\$622)          |
| United Arab Emirates                                                                      | 12,138<br>(9,908, 13,358)     | 6-monthly PWID testing + GP testing + vaccination                   | 6-monthly PWID testing + GP testing | 80<br>(71, 87) | 39<br>(21, 59) | \$10.71  | \$870<br>(\$760, \$980)          | \$146<br>(\$128, \$164) | -\$723<br>(-\$816, -\$631)          |
| Saudi Arabia                                                                              | 6,381<br>(3,625, 8,511)       | 2-yearly PWID testing + vaccination                                 | 6-monthly PWID testing              | 84<br>(75, 91) | 67<br>(52, 81) | \$406.45 | \$24<br>(\$21, \$27)             | \$41<br>(\$37, \$45)    | \$18<br>(\$16, \$18)                |
| Kuwait                                                                                    | 6,084<br>(5,210, 6,537)       | 6-monthly PWID testing + GP testing + vaccination + age vaccination | 6-monthly PWID testing + GP testing | 72<br>(65, 78) | 42<br>(30, 55) | \$8.60   | \$367<br>(\$327, \$407)          | \$47<br>(\$42, \$53)    | -\$320<br>(-\$355, -\$285)          |
| Afghanistan                                                                               | 5,119<br>(1,855, 7,784)       | 2-yearly PWID testing + vaccination                                 | 6-monthly PWID testing              | 89<br>(82, 94) | 79<br>(69, 88) | \$145.74 | \$56<br>(\$49, \$63)             | \$43<br>(\$39, \$46)    | -\$13<br>(-\$17, -\$10)             |
| Yemen                                                                                     | 4,644<br>(4,079, 5,033)       | 6-monthly PWID testing + GP testing + vaccination + age vaccination | 6-monthly PWID testing + GP testing | 79<br>(74, 83) | 66<br>(59, 72) | \$1.18   | \$1,685<br>(\$1,500, \$1,871)    | \$28<br>(\$24, \$31)    | -\$1,658<br>(-\$1,840, -\$1,475)    |
| Qatar                                                                                     | 4,429<br>(3,911, 4,856)       | 6-monthly PWID testing + GP testing + vaccination + age vaccination | GP testing                          | 78<br>(67, 87) | 8<br>(7, 9)    | \$7.88   | \$272<br>(\$241, \$304)          | \$52<br>(\$46, \$59)    | -\$220<br>(-\$245, -\$196)          |
| Iraq                                                                                      | 2,816<br>(1,310, 4,026)       | 2-yearly PWID testing + vaccination                                 | 6-monthly PWID testing              | 87<br>(80, 93) | 75<br>(63, 86) | \$213.85 | \$19<br>(\$17, \$21)             | \$20<br>(\$18, \$22)    | \$1<br>(\$0, \$2)                   |
| Iran                                                                                      | 2,609<br>(2,480, 2,714)       | 6-monthly PWID testing + GP testing + vaccination + age vaccination | 6-monthly PWID testing + GP testing | 61<br>(55, 66) | 44<br>(38, 49) | \$1.48   | \$6,213<br>(\$5,531, \$6,897)    | \$157<br>(\$137, \$176) | -\$6,056<br>(-\$6,721, -\$5,393)    |

|                                                                                           |                               |                                                                     |                                     |                |                |          |                               |                         |                                  |
|-------------------------------------------------------------------------------------------|-------------------------------|---------------------------------------------------------------------|-------------------------------------|----------------|----------------|----------|-------------------------------|-------------------------|----------------------------------|
| Tunisia                                                                                   | 2,228<br>(2,043, 2,345)       | 6-monthly PWID testing + GP testing + vaccination + age vaccination | 6-monthly PWID testing + GP testing | 74<br>(69, 78) | 61<br>(54, 67) | \$1.66   | \$844<br>(\$751, \$937)       | \$22<br>(\$20, \$25)    | -\$821<br>(-\$912, -\$731)       |
| Bahrain                                                                                   | 1,668<br>(1,356, 1,840)       | 6-monthly PWID testing + GP testing + vaccination                   | 6-monthly PWID testing + GP testing | 82<br>(72, 89) | 38<br>(20, 59) | \$7.42   | \$116<br>(\$102, \$131)       | \$13<br>(\$12, \$15)    | -\$103<br>(-\$116, -\$90)        |
| Djibouti                                                                                  | 1,056<br>(890, 1,144)         | 6-monthly PWID testing + GP testing + vaccination + age vaccination | 6-monthly PWID testing + GP testing | 74<br>(66, 80) | 41<br>(28, 56) | \$3.80   | \$66<br>(\$58, \$73)          | \$4<br>(\$3, \$4)       | -\$62<br>(-\$69, -\$55)          |
| Cyprus                                                                                    | 468<br>(450, 480)             | 6-monthly PWID testing + GP testing + vaccination + age vaccination | 6-monthly PWID testing + GP testing | 62<br>(56, 67) | 45<br>(39, 50) | \$5.08   | \$93<br>(\$83, \$104)         | \$10<br>(\$8, \$11)     | -\$84<br>(-\$93, -\$74)          |
| Lebanon                                                                                   | 410<br>(169, 605)             | 2-yearly PWID testing + vaccination                                 | 6-monthly PWID testing              | 88<br>(81, 94) | 77<br>(67, 87) | \$232.24 | \$4<br>(\$3, \$4)             | \$4<br>(\$4, \$5)       | \$0<br>(\$0, \$1)                |
| Oman                                                                                      | 352<br>(322, 371)             | 6-monthly PWID testing + GP testing + vaccination + age vaccination | 6-monthly PWID testing + GP testing | 76<br>(71, 80) | 64<br>(57, 69) | \$3.87   | \$369<br>(\$327, \$410)       | \$24<br>(\$21, \$27)    | -\$345<br>(-\$383, -\$306)       |
| Jordan                                                                                    |                               | Same as non-vaccine strategy                                        | Annual PWID testing                 |                | 83<br>(75, 90) | \$46.55  |                               | \$1<br>(\$1, \$2)       |                                  |
| EURO region, sorted by additional cases that could be averted if a vaccine were available |                               |                                                                     |                                     |                |                |          |                               |                         |                                  |
| Italy                                                                                     | 166,062<br>(128,922, 188,377) | Annual PWID testing + vaccination                                   | 6-monthly PWID testing              | 84<br>(74, 93) | 36<br>(15, 61) | \$435.83 | \$203<br>(\$179, \$227)       | \$360<br>(\$323, \$393) | \$156<br>(\$144, \$165)          |
| Ukraine                                                                                   | 119,209<br>(90,994, 137,628)  | Annual PWID testing + vaccination                                   | 6-monthly PWID testing              | 87<br>(78, 94) | 50<br>(31, 70) | \$213.35 | \$159<br>(\$140, \$178)       | \$168<br>(\$154, \$178) | \$8<br>(\$0, \$14)               |
| Uzbekistan                                                                                | 99,338<br>(87,887, 108,847)   | 6-monthly PWID testing + GP testing + vaccination + age vaccination | GP testing                          | 74<br>(64, 82) | 13<br>(11, 14) | **       | \$2,371<br>(\$2,106, \$2,637) | \$76<br>(\$67, \$86)    | -\$2,295<br>(-\$2,551, -\$2,040) |
| Georgia                                                                                   | 36,868<br>(27,990, 42,811)    | Annual PWID testing + vaccination                                   | 6-monthly PWID testing              | 88<br>(79, 94) | 54<br>(36, 73) | \$216.59 | \$55<br>(\$49, \$62)          | \$59<br>(\$54, \$63)    | \$4<br>(\$1, \$5)                |
| Turkey                                                                                    | 34,206<br>(18,597, 46,425)    | 2-yearly PWID testing + vaccination                                 | 6-monthly PWID testing              | 85<br>(77, 92) | 69<br>(56, 83) | \$307.15 | \$147<br>(\$129, \$165)       | \$208<br>(\$188, \$226) | \$60<br>(\$58, \$60)             |
| United Kingdom                                                                            | 23,422<br>(12,642, 31,876)    | 2-yearly PWID testing + vaccination                                 | 6-monthly PWID testing              | 85<br>(77, 92) | 70<br>(56, 83) | \$588.05 | \$123<br>(\$108, \$138)       | \$277<br>(\$247, \$307) | \$154<br>(\$139, \$169)          |
| Kyrgyzstan                                                                                | 21,044<br>(16,965, 23,276)    | 6-monthly PWID testing + vaccination                                | 6-monthly PWID testing              | 88<br>(78, 95) | 27<br>(4, 54)  | \$200.39 | \$18<br>(\$16, \$20)          | \$18<br>(\$17, \$19)    | \$0<br>(-\$1, \$1)               |
| Poland                                                                                    | 17,962<br>(9,879, 24,275)     | 2-yearly PWID testing + vaccination                                 | 6-monthly PWID testing              | 85<br>(76, 92) | 69<br>(55, 82) | \$324.32 | \$74<br>(\$65, \$83)          | \$108<br>(\$98, \$118)  | \$35<br>(\$33, \$35)             |
| Kazakhstan                                                                                | 16,004<br>(9,439, 21,001)     | 2-yearly PWID testing + vaccination                                 | 6-monthly PWID testing              | 83<br>(73, 90) | 64<br>(48, 79) | \$303.07 | \$47<br>(\$41, \$53)          | \$66<br>(\$60, \$71)    | \$18<br>(\$18, \$18)             |
| Romania                                                                                   | 14,452<br>(12,198, 16,002)    | 6-monthly PWID testing + GP testing + vaccination                   | 6-monthly PWID testing + GP testing | 80<br>(75, 85) | 67<br>(58, 75) | \$6.30   | \$1,371<br>(\$1,198, \$1,545) | \$109<br>(\$96, \$121)  | -\$1,262<br>(-\$1,424, -\$1,102) |
| Israel                                                                                    | 13,577<br>(10,368, 15,664)    | Annual PWID testing + vaccination                                   | 6-monthly PWID testing              | 87<br>(77, 94) | 48<br>(29, 69) | \$461.00 | \$22<br>(\$19, \$25)          | \$41<br>(\$36, \$45)    | \$19<br>(\$17, \$20)             |
| Denmark                                                                                   | 13,545<br>(11,543, 15,321)    | 6-monthly PWID testing + vaccination                                | **                                  | 79<br>(65, 91) | 0<br>(0, 0)    | **       | \$14<br>(\$13, \$16)          | \$0<br>(\$0, \$0)       | -\$14<br>(-\$16, -\$13)          |

|              |                            |                                                                     |                                     |                |                |          |                         |                         |                            |
|--------------|----------------------------|---------------------------------------------------------------------|-------------------------------------|----------------|----------------|----------|-------------------------|-------------------------|----------------------------|
| France       | 12,678<br>(7,583, 16,530)  | 2-yearly PWID testing + vaccination                                 | 6-monthly PWID testing              | 82<br>(73, 90) | 62<br>(46, 78) | \$588.89 | \$42<br>(\$37, \$47)    | \$93<br>(\$83, \$103)   | \$52<br>(\$47, \$56)       |
| Portugal     | 11,864<br>(10,254, 13,256) | 6-monthly PWID testing + vaccination                                | **                                  | 81<br>(68, 92) | 0<br>(0, 0)    | **       | \$11<br>(\$9, \$12)     | \$0<br>(\$0, \$0)       | -\$11<br>(-\$12, -\$9)     |
| Latvia       | 9,421<br>(8,014, 10,676)   | 6-monthly PWID testing + vaccination                                | **                                  | 79<br>(65, 91) | 0<br>(0, 0)    | **       | \$8<br>(\$7, \$9)       | \$0<br>(\$0, \$0)       | -\$8<br>(-\$9, -\$7)       |
| Bulgaria     | 7,639<br>(5,858, 8,775)    | Annual PWID testing + vaccination                                   | 6-monthly PWID testing              | 86<br>(76, 93) | 46<br>(26, 67) | \$258.44 | \$10<br>(\$9, \$11)     | \$12<br>(\$11, \$13)    | \$2<br>(\$2, \$2)          |
| Switzerland  | 6,891<br>(5,345, 7,824)    | Annual PWID testing + vaccination                                   | 6-monthly PWID testing              | 84<br>(74, 93) | 37<br>(15, 61) | \$775.51 | \$11<br>(\$10, \$12)    | \$27<br>(\$24, \$30)    | \$16<br>(\$14, \$18)       |
| Estonia      | 6,491<br>(5,526, 7,348)    | 6-monthly PWID testing + vaccination                                | **                                  | 79<br>(65, 91) | 0<br>(0, 0)    | **       | \$6<br>(\$5, \$6)       | \$0<br>(\$0, \$0)       | -\$6<br>(-\$6, -\$5)       |
| Sweden       | 6,421<br>(5,206, 7,060)    | 6-monthly PWID testing + vaccination                                | 6-monthly PWID testing              | 87<br>(77, 95) | 23<br>(0, 51)  | \$590.69 | \$7<br>(\$6, \$8)       | \$12<br>(\$11, \$14)    | \$6<br>(\$5, \$6)          |
| Belarus      | 5,347<br>(3,133, 7,037)    | 2-yearly PWID testing + vaccination                                 | 6-monthly PWID testing              | 83<br>(74, 90) | 64<br>(49, 79) | \$274.22 | \$16<br>(\$14, \$18)    | \$21<br>(\$19, \$22)    | \$5<br>(\$4, \$5)          |
| Germany      | 5,276<br>(2,105, 7,854)    | 2-yearly PWID testing + vaccination                                 | 6-monthly PWID testing              | 88<br>(82, 94) | 78<br>(67, 88) | \$551.32 | \$63<br>(\$55, \$71)    | \$137<br>(\$122, \$153) | \$74<br>(\$66, \$82)       |
| Finland      | 5,263<br>(3,983, 6,131)    | Annual PWID testing + vaccination                                   | 6-monthly PWID testing              | 88<br>(80, 94) | 56<br>(38, 74) | \$487.12 | \$11<br>(\$9, \$12)     | \$20<br>(\$18, \$22)    | \$10<br>(\$9, \$10)        |
| Azerbaijan   | 5,164<br>(2,948, 6,871)    | 2-yearly PWID testing + vaccination                                 | 6-monthly PWID testing + GP testing | 83<br>(74, 91) | 66<br>(51, 80) | \$584.78 | \$17<br>(\$15, \$19)    | \$43<br>(\$39, \$47)    | \$26<br>(\$23, \$28)       |
| Norway       | 4,350<br>(3,378, 4,934)    | Annual PWID testing + vaccination                                   | 6-monthly PWID testing              | 85<br>(74, 93) | 38<br>(17, 62) | \$699.03 | \$6<br>(\$6, \$7)       | \$15<br>(\$13, \$17)    | \$9<br>(\$8, \$9)          |
| Tajikistan   | 3,832<br>(2,842, 4,579)    | 6-monthly PWID testing + vaccination                                | 6-monthly PWID testing + GP testing | 80<br>(76, 83) | 72<br>(61, 81) | \$239.76 | \$14<br>(\$12, \$16)    | \$17<br>(\$15, \$18)    | \$2<br>(\$2, \$2)          |
| Macedonia    | 3,725<br>(2,840, 4,304)    | Annual PWID testing + vaccination                                   | 6-monthly PWID testing              | 87<br>(78, 94) | 50<br>(31, 70) | \$237.68 | \$5<br>(\$5, \$6)       | \$6<br>(\$5, \$6)       | \$1<br>(\$1, \$1)          |
| Belgium      | 3,566<br>(2,092, 4,690)    | 2-yearly PWID testing + vaccination                                 | 6-monthly PWID testing              | 83<br>(74, 90) | 64<br>(49, 79) | \$621.88 | \$13<br>(\$11, \$15)    | \$30<br>(\$27, \$33)    | \$17<br>(\$16, \$19)       |
| Czechia      | 3,257<br>(1,415, 4,745)    | 2-yearly PWID testing + vaccination                                 | 6-monthly PWID testing              | 88<br>(81, 94) | 77<br>(65, 87) | \$336.63 | \$29<br>(\$25, \$32)    | \$44<br>(\$39, \$48)    | \$15<br>(\$14, \$16)       |
| Austria      | 3,030<br>(1,835, 3,927)    | 2-yearly PWID testing + vaccination                                 | 6-monthly PWID testing              | 81<br>(72, 90) | 61<br>(44, 77) | \$670.22 | \$10<br>(\$9, \$11)     | \$24<br>(\$21, \$26)    | \$14<br>(\$13, \$15)       |
| Libya        | 2,454<br>(2,120, 2,751)    | 6-monthly PWID testing + GP testing + vaccination + age vaccination | GP testing                          | 69<br>(59, 78) | 18<br>(15, 20) | \$3.96   | \$488<br>(\$435, \$542) | \$43<br>(\$38, \$49)    | -\$445<br>(-\$493, -\$398) |
| Turkmenistan | 2,163<br>(1,149, 2,962)    | 2-yearly PWID testing + vaccination                                 | 6-monthly PWID testing              | 85<br>(77, 92) | 71<br>(57, 83) | \$258.31 | \$10<br>(\$9, \$11)     | \$12<br>(\$11, \$13)    | \$2<br>(\$2, \$2)          |
| Moldova      | 1,896<br>(1,541, 2,147)    | 6-monthly PWID testing + GP testing + vaccination                   | 6-monthly PWID testing + GP testing | 87<br>(81, 91) | 71<br>(61, 80) | \$2.92   | \$261<br>(\$228, \$295) | \$9<br>(\$8, \$10)      | -\$253<br>(-\$285, -\$221) |

|                                                                                           |                               |                                                                     |                                     |                |                |          |                               |                               |                               |
|-------------------------------------------------------------------------------------------|-------------------------------|---------------------------------------------------------------------|-------------------------------------|----------------|----------------|----------|-------------------------------|-------------------------------|-------------------------------|
| Luxembourg                                                                                | 1,868<br>(1,632, 2,068)       | 6-monthly PWID testing + vaccination                                | **                                  | 83<br>(71, 93) | 0<br>(0, 0)    | **       | \$2<br>(\$2, \$3)             | \$0<br>(\$0, \$0)             | -\$2<br>(-\$3, -\$2)          |
| Lithuania                                                                                 | 1,699<br>(1,375, 1,906)       | 6-monthly PWID testing + GP testing + vaccination                   | 6-monthly PWID testing + GP testing | 83<br>(75, 88) | 57<br>(42, 71) | \$5.23   | \$196<br>(\$171, \$221)       | \$16<br>(\$14, \$18)          | -\$180<br>(-\$203, -\$157)    |
| Spain                                                                                     | 1,149<br>(655, 1,532)         | 2-yearly PWID testing + vaccination                                 | 6-monthly PWID testing              | 84<br>(75, 91) | 67<br>(52, 81) | \$467.89 | \$4<br>(\$4, \$5)             | \$8<br>(\$7, \$9)             | \$4<br>(\$4, \$4)             |
| Ireland                                                                                   | 1,122<br>(654, 1,481)         | 2-yearly PWID testing + vaccination                                 | 6-monthly PWID testing              | 83<br>(74, 91) | 65<br>(49, 80) | \$837.35 | \$5<br>(\$4, \$5)             | \$13<br>(\$12, \$15)          | \$8<br>(\$8, \$9)             |
| Hungary                                                                                   | 1,108<br>(1,006, 1,171)       | 6-monthly PWID testing + GP testing + vaccination + age vaccination | 6-monthly PWID testing + GP testing | 72<br>(67, 77) | 57<br>(50, 64) | \$2.78   | \$728<br>(\$648, \$809)       | \$39<br>(\$34, \$44)          | -\$689<br>(-\$765, -\$613)    |
| Bosnia and Herzegovina                                                                    | 649<br>(256, 968)             | 2-yearly PWID testing + vaccination                                 | 6-monthly PWID testing              | 89<br>(82, 94) | 78<br>(67, 88) | \$194.23 | \$6<br>(\$6, \$7)             | \$6<br>(\$6, \$7)             | \$0<br>(\$0, \$0)             |
| Armenia                                                                                   | 526<br>(211, 782)             | 2-yearly PWID testing + vaccination                                 | 6-monthly PWID testing + GP testing | 88<br>(81, 93) | 77<br>(67, 87) | \$448.17 | \$5<br>(\$4, \$5)             | \$10<br>(\$9, \$11)           | \$5<br>(\$5, \$6)             |
| Croatia                                                                                   | 493<br>(253, 683)             | 2-yearly PWID testing + vaccination                                 | 6-monthly PWID testing              | 86<br>(78, 92) | 72<br>(59, 84) | \$305.32 | \$3<br>(\$2, \$3)             | \$4<br>(\$3, \$4)             | \$1<br>(\$1, \$1)             |
| Slovakia                                                                                  | 432<br>(105, 704)             | 2-yearly PWID testing + vaccination                                 | 6-monthly PWID testing              | 90<br>(84, 95) | 81<br>(72, 90) | \$273.03 | \$8<br>(\$7, \$9)             | \$10<br>(\$9, \$11)           | \$2<br>(\$2, \$2)             |
| Greece                                                                                    | 405<br>(209, 561)             | 2-yearly PWID testing + vaccination                                 | 6-monthly PWID testing              | 86<br>(78, 92) | 72<br>(59, 84) | \$358.97 | \$2<br>(\$2, \$2)             | \$3<br>(\$3, \$4)             | \$1<br>(\$1, \$1)             |
| Netherlands                                                                               | 252<br>(127, 350)             | 2-yearly PWID testing + vaccination                                 | 6-monthly PWID testing              | 86<br>(78, 93) | 73<br>(60, 85) | \$620.48 | \$2<br>(\$1, \$2)             | \$4<br>(\$3, \$4)             | \$2<br>(\$2, \$2)             |
| Iceland                                                                                   | 51<br>(19, 77)                | 2-yearly PWID testing + vaccination                                 | 6-monthly PWID testing              | 89<br>(82, 94) | 80<br>(68, 88) | \$718.31 | \$1<br>(\$1, \$1)             | \$2<br>(\$2, \$2)             | \$1<br>(\$1, \$1)             |
| Albania                                                                                   |                               | Same as non-vaccine strategy                                        | 6-monthly PWID testing              |                | 81<br>(71, 89) | \$163.79 |                               | \$4<br>(\$4, \$5)             |                               |
| Russia                                                                                    |                               | Same as non-vaccine strategy                                        | Annual PWID testing                 |                | 80<br>(71, 89) | \$81.58  |                               | \$337<br>(\$301, \$371)       |                               |
| Slovenia                                                                                  |                               | Same as non-vaccine strategy                                        | Annual PWID testing                 |                | 82<br>(73, 90) | \$127.3  |                               | \$2<br>(\$1, \$2)             |                               |
| PAHO region, sorted by additional cases that could be averted if a vaccine were available |                               |                                                                     |                                     |                |                |          |                               |                               |                               |
| United States of America                                                                  | 220,603<br>(119,627, 299,808) | 2-yearly PWID testing + vaccination                                 | 6-monthly PWID testing              | 85<br>(77, 92) | 70<br>(56, 83) | \$749.73 | \$1,206<br>(\$1,059, \$1,352) | \$3,168<br>(\$2,807, \$3,517) | \$1,962<br>(\$1,748, \$2,165) |
| Canada                                                                                    | 149,364<br>(115,582, 170,033) | Annual PWID testing + vaccination                                   | 6-monthly PWID testing              | 85<br>(75, 93) | 40<br>(19, 64) | \$502.68 | \$202<br>(\$178, \$226)       | \$392<br>(\$350, \$430)       | \$189<br>(\$172, \$203)       |
| Mexico                                                                                    | 121,064<br>(102,928, 137,252) | 6-monthly PWID testing + vaccination                                | **                                  | 79<br>(65, 91) | 0<br>(0, 0)    | **       | \$103<br>(\$90, \$115)        | \$0<br>(\$0, \$0)             | -\$103<br>(-\$115, -\$90)     |
| Peru                                                                                      | 70,210<br>(60,367, 78,801)    | 6-monthly PWID testing + vaccination                                | **                                  | 81<br>(67, 92) | 0<br>(0, 0)    | **       | \$58<br>(\$51, \$65)          | \$0<br>(\$0, \$0)             | -\$58<br>(-\$65, -\$51)       |

|                     |                            |                                                                     |                                     |                |                |            |                         |                         |                            |
|---------------------|----------------------------|---------------------------------------------------------------------|-------------------------------------|----------------|----------------|------------|-------------------------|-------------------------|----------------------------|
| Chile               | 20,168<br>(15,457, 23,190) | Annual PWID testing + vaccination                                   | 6-monthly PWID testing              | 86<br>(77, 94) | 47<br>(28, 69) | \$294.42   | \$27<br>(\$24, \$30)    | \$36<br>(\$33, \$39)    | \$9<br>(\$9, \$9)          |
| Guatemala           | 16,844<br>(12,876, 19,412) | Annual PWID testing + vaccination                                   | 6-monthly PWID testing              | 86<br>(77, 94) | 48<br>(28, 69) | \$233.48   | \$22<br>(\$20, \$25)    | \$25<br>(\$23, \$27)    | \$3<br>(\$2, \$3)          |
| El Salvador         | 13,890<br>(12,261, 15,239) | 6-monthly PWID testing + vaccination                                | **                                  | 85<br>(73, 94) | 0<br>(0, 0)    | **         | \$11<br>(\$10, \$12)    | \$0<br>(\$0, \$0)       | -\$11<br>(-\$12, -\$10)    |
| Cuba                | 13,631<br>(10,421, 15,706) | Annual PWID testing + vaccination                                   | 6-monthly PWID testing              | 86<br>(77, 94) | 48<br>(28, 69) | \$273.61   | \$19<br>(\$16, \$21)    | \$24<br>(\$22, \$26)    | \$5<br>(\$5, \$5)          |
| Dominican Republic  | 11,900<br>(9,108, 13,698)  | Annual PWID testing + vaccination                                   | 6-monthly PWID testing              | 86<br>(77, 94) | 48<br>(28, 69) | \$248.61   | \$16<br>(\$14, \$17)    | \$18<br>(\$17, \$20)    | \$3<br>(\$2, \$3)          |
| Haiti               | 11,741<br>(8,985, 13,519)  | Annual PWID testing + vaccination                                   | 6-monthly PWID testing              | 86<br>(77, 94) | 48<br>(28, 69) | \$207.97   | \$15<br>(\$13, \$17)    | \$15<br>(\$14, \$16)    | \$0<br>(\$0, \$1)          |
| Bolivia             | 11,589<br>(8,866, 13,347)  | Annual PWID testing + vaccination                                   | 6-monthly PWID testing              | 86<br>(77, 94) | 48<br>(28, 69) | \$224.80   | \$15<br>(\$13, \$17)    | \$16<br>(\$15, \$18)    | \$1<br>(\$1, \$2)          |
| Argentina           | 7,389<br>(3,926, 10,112)   | 2-yearly PWID testing + vaccination                                 | 6-monthly PWID testing + GP testing | 85<br>(77, 92) | 70<br>(57, 83) | \$1,528.17 | \$34<br>(\$30, \$39)    | \$208<br>(\$183, \$232) | \$173<br>(\$153, \$193)    |
| Ecuador             | 3,397<br>(1,730, 4,720)    | 2-yearly PWID testing + vaccination                                 | 6-monthly PWID testing              | 86<br>(78, 93) | 72<br>(60, 84) | \$244.63   | \$18<br>(\$16, \$20)    | \$21<br>(\$19, \$23)    | \$3<br>(\$3, \$3)          |
| Jamaica             | 3,363<br>(2,572, 3,873)    | Annual PWID testing + vaccination                                   | 6-monthly PWID testing              | 86<br>(77, 94) | 48<br>(28, 69) | \$237.27   | \$4<br>(\$4, \$5)       | \$5<br>(\$5, \$5)       | \$1<br>(\$0, \$1)          |
| Trinidad and Tobago | 1,634<br>(1,250, 1,883)    | Annual PWID testing + vaccination                                   | 6-monthly PWID testing              | 86<br>(77, 94) | 48<br>(28, 69) | \$314.63   | \$2<br>(\$2, \$3)       | \$3<br>(\$3, \$4)       | \$1<br>(\$1, \$1)          |
| Panama              | 1,568<br>(923, 2,060)      | 2-yearly PWID testing + vaccination                                 | 6-monthly PWID testing              | 83<br>(73, 90) | 64<br>(48, 79) | \$358.17   | \$5<br>(\$4, \$5)       | \$8<br>(\$7, \$8)       | \$3<br>(\$3, \$3)          |
| Honduras            | 1,557<br>(744, 2,208)      | 2-yearly PWID testing + vaccination                                 | 6-monthly PWID testing              | 87<br>(79, 93) | 75<br>(62, 86) | \$196.49   | \$10<br>(\$8, \$11)     | \$9<br>(\$9, \$10)      | \$0<br>(-\$1, \$0)         |
| Venezuela           | 1,552<br>(292, 2,594)      | 2-yearly PWID testing + vaccination                                 | 6-monthly PWID testing              | 90<br>(84, 95) | 82<br>(73, 90) | \$204.44   | \$34<br>(\$30, \$38)    | \$35<br>(\$31, \$38)    | \$1<br>(\$0, \$1)          |
| Paraguay            | 1,077<br>(1,009, 1,117)    | 6-monthly PWID testing + GP testing + vaccination + age vaccination | 6-monthly PWID testing + GP testing | 73<br>(68, 78) | 60<br>(54, 66) | \$1.87     | \$476<br>(\$424, \$527) | \$13<br>(\$12, \$15)    | -\$462<br>(-\$513, -\$412) |
| Guyana              | 900<br>(689, 1,036)        | Annual PWID testing + vaccination                                   | 6-monthly PWID testing              | 86<br>(77, 94) | 48<br>(28, 69) | \$232.64   | \$1<br>(\$1, \$1)       | \$1<br>(\$1, \$1)       | \$0<br>(\$0, \$0)          |
| Nicaragua           | 757<br>(319, 1,111)        | 2-yearly PWID testing + vaccination                                 | 6-monthly PWID testing              | 88<br>(81, 94) | 77<br>(66, 87) | \$176.77   | \$7<br>(\$6, \$7)       | \$6<br>(\$5, \$6)       | -\$1<br>(-\$1, \$0)        |
| Costa Rica          | 713<br>(691, 725)          | 6-monthly PWID testing + GP testing + vaccination + age vaccination | 6-monthly PWID testing + GP testing | 63<br>(58, 68) | 47<br>(41, 52) | \$3.69     | \$377<br>(\$335, \$418) | \$21<br>(\$19, \$24)    | -\$355<br>(-\$394, -\$317) |
| Suriname            | 652<br>(499, 751)          | Annual PWID testing + vaccination                                   | 6-monthly PWID testing              | 86<br>(77, 94) | 48<br>(28, 69) | \$242.88   | \$1<br>(\$1, \$1)       | \$1<br>(\$1, \$1)       | \$0<br>(\$0, \$0)          |
| Uruguay             | 530<br>(457, 581)          | 6-monthly PWID testing + GP testing + vaccination                   | 6-monthly PWID testing + GP testing | 81<br>(76, 85) | 70<br>(63, 76) | \$4.73     | \$228<br>(\$199, \$257) | \$18<br>(\$15, \$20)    | -\$210<br>(-\$237, -\$184) |

|                                                                                            |                               |                                                                     |                                     |                |                |                |                                   |                               |                                      |
|--------------------------------------------------------------------------------------------|-------------------------------|---------------------------------------------------------------------|-------------------------------------|----------------|----------------|----------------|-----------------------------------|-------------------------------|--------------------------------------|
| Belize                                                                                     | 401<br>(306, 462)             | Annual PWID testing + vaccination                                   | 6-monthly PWID testing              | 86<br>(77, 94) | 48<br>(28, 69) | \$237.63       | \$1<br>(\$0, \$1)                 | \$1<br>(\$1, \$1)             | \$0<br>(\$0, \$0)                    |
| Antigua and Barbuda                                                                        | 127<br>(97, 146)              | Annual PWID testing + vaccination                                   | 6-monthly PWID testing              | 86<br>(77, 94) | 47<br>(28, 69) | \$298.76       | \$0<br>(\$0, \$0)                 | \$0<br>(\$0, \$0)             | \$0<br>(\$0, \$0)                    |
| Brazil                                                                                     |                               | Same as non-vaccine strategy                                        | Annual PWID testing                 |                | 80<br>(71, 89) | \$80.9         |                                   | \$27<br>(\$25, \$30)          |                                      |
| Colombia                                                                                   |                               | Same as non-vaccine strategy                                        | 6-monthly PWID testing              |                | 82<br>(73, 90) | \$162.45       |                                   | \$45<br>(\$41, \$49)          |                                      |
| SEARO region, sorted by additional cases that could be averted if a vaccine were available |                               |                                                                     |                                     |                |                |                |                                   |                               |                                      |
| Indonesia                                                                                  | 161,966<br>(142,638, 177,769) | 6-monthly PWID testing + GP testing + vaccination                   | GP testing                          | 81<br>(69, 91) | 3<br>(3, 4)    | \$0.31         | \$17,261<br>(\$15,082, \$19,449)  | \$344<br>(\$301, \$387)       | -\$16,917<br>(-\$19,062, -\$14,780)  |
| India                                                                                      | 126,103<br>(116,166, 131,797) | 6-monthly PWID testing + GP testing + vaccination + age vaccination | 6-monthly PWID testing + GP testing | 70<br>(64, 75) | 54<br>(47, 61) | \$0.71         | \$92,119<br>(\$81,830, \$102,422) | \$1,278<br>(\$1,124, \$1,432) | -\$90,840<br>(-\$100,991, -\$80,707) |
| Thailand                                                                                   | 48,553<br>(41,050, 55,270)    | 6-monthly PWID testing + GP testing + vaccination + age vaccination | GP testing                          | 73<br>(59, 84) | 7<br>(7, 8)    | \$0.69         | \$5,356<br>(\$4,770, \$5,943)     | \$146<br>(\$128, \$164)       | -\$5,210<br>(-\$5,779, -\$4,642)     |
| Myanmar                                                                                    | 21,698<br>(12,417, 28,859)    | 2-yearly PWID testing + vaccination                                 | 6-monthly PWID testing              | 83<br>(75, 91) | 66<br>(51, 81) | \$227.80       | \$68<br>(\$60, \$77)              | \$76<br>(\$70, \$81)          | \$8<br>(\$4, \$10)                   |
| Bangladesh                                                                                 | 16,801<br>(15,374, 17,677)    | 6-monthly PWID testing + GP testing + vaccination + age vaccination | 6-monthly PWID testing + GP testing | 72<br>(67, 77) | 58<br>(51, 65) | \$0.72         | \$11,412<br>(\$10,147, \$12,678)  | \$149<br>(\$131, \$167)       | -\$11,263<br>(-\$12,512, -\$10,016)  |
| Nepal                                                                                      | 2,375<br>(2,261, 2,467)       | 6-monthly PWID testing + GP testing + vaccination + age vaccination | 6-monthly PWID testing + GP testing | 61<br>(55, 66) | 43<br>(38, 49) | \$0.42         | \$1,960<br>(\$1,747, \$2,174)     | \$18<br>(\$16, \$21)          | -\$1,942<br>(-\$2,153, -\$1,731)     |
| Sri Lanka                                                                                  | 1,387<br>(1,315, 1,444)       | 6-monthly PWID testing + GP testing + vaccination + age vaccination | 6-monthly PWID testing + GP testing | 60<br>(55, 66) | 44<br>(38, 49) | \$0.85         | \$1,483<br>(\$1,317, \$1,648)     | \$30<br>(\$26, \$34)          | -\$1,452<br>(-\$1,615, -\$1,291)     |
| Bhutan                                                                                     | 205<br>(170, 228)             | 6-monthly PWID testing + GP testing + vaccination + age vaccination | 6-monthly PWID testing + GP testing | 81<br>(74, 86) | 60<br>(48, 71) | \$1.38         | \$60<br>(\$53, \$66)              | \$1<br>(\$1, \$1)             | -\$58<br>(-\$65, -\$52)              |
| Timor-Leste                                                                                | 10<br>(6, 13)                 | 2-yearly PWID testing + vaccination                                 | 6-monthly PWID testing + GP testing | 81<br>(72, 89) | 62<br>(46, 78) | \$5,776.4<br>7 | \$0<br>(\$0, \$0)                 | \$1<br>(\$1, \$1)             | \$1<br>(\$1, \$1)                    |
| WPRO region, sorted by additional cases that could be averted if a vaccine were available  |                               |                                                                     |                                     |                |                |                |                                   |                               |                                      |
| Malaysia                                                                                   | 237,068<br>(202,081, 268,075) | 6-monthly PWID testing + vaccination                                | **                                  | 79<br>(65, 91) | 0<br>(0, 0)    | **             | \$197<br>(\$173, \$220)           | \$0<br>(\$0, \$0)             | -\$197<br>(-\$220, -\$173)           |
| China                                                                                      | 99,374<br>(26,976, 158,390)   | 2-yearly PWID testing + vaccination                                 | 6-monthly PWID testing + GP testing | 82<br>(76, 88) | 74<br>(64, 84) | \$1,200.0<br>6 | \$1,001<br>(\$878, \$1,124)       | \$5,034<br>(\$4,437, \$5,622) | \$4,033<br>(\$3,559, \$4,498)        |
| South Korea                                                                                | 71,079<br>(61,905, 78,873)    | 6-monthly PWID testing + vaccination                                | **                                  | 83<br>(70, 93) | 0<br>(0, 0)    | **             | \$64<br>(\$57, \$72)              | \$0<br>(\$0, \$0)             | -\$64<br>(-\$72, -\$57)              |
| Japan                                                                                      | 26,772<br>(13,520, 37,302)    | 2-yearly PWID testing + vaccination                                 | 6-monthly PWID testing              | 86<br>(79, 93) | 73<br>(60, 85) | \$557.85       | \$176<br>(\$155, \$198)           | \$384<br>(\$342, \$426)       | \$208<br>(\$187, \$228)              |
| Philippines                                                                                | 19,987<br>(17,425, 21,374)    | 6-monthly PWID testing + GP testing + vaccination + age vaccination | 6-monthly PWID testing + GP testing | 70<br>(63, 76) | 46<br>(35, 57) | \$1.06         | \$6,982<br>(\$6,210, \$7,755)     | \$137<br>(\$121, \$154)       | -\$6,844<br>(-\$7,601, -\$6,089)     |

|                  |                            |                                                                     |                                     |                |                |          |                               |                         |                                  |
|------------------|----------------------------|---------------------------------------------------------------------|-------------------------------------|----------------|----------------|----------|-------------------------------|-------------------------|----------------------------------|
| Vietnam          | 18,745<br>(18,259, 18,964) | 6-monthly PWID testing + GP testing + vaccination + age vaccination | 6-monthly PWID testing + GP testing | 64<br>(58, 69) | 48<br>(42, 53) | \$0.99   | \$7,154<br>(\$6,366, \$7,943) | \$142<br>(\$124, \$159) | -\$7,012<br>(-\$7,784, -\$6,242) |
| Papua New Guinea | 8,832<br>(7,506, 10,017)   | 6-monthly PWID testing + vaccination                                | **                                  | 79<br>(64, 91) | 0<br>(0, 0)    | **       | \$7<br>(\$6, \$8)             | \$0<br>(\$0, \$0)       | -\$7<br>(-\$8, -\$6)             |
| Cambodia         | 6,385<br>(6,024, 6,565)    | 6-monthly PWID testing + GP testing + vaccination + age vaccination | 6-monthly PWID testing + GP testing | 68<br>(63, 73) | 51<br>(44, 58) | \$1.18   | \$1,111<br>(\$991, \$1,230)   | \$24<br>(\$21, \$26)    | -\$1,087<br>(-\$1,204, -\$971)   |
| Australia        | 3,747<br>(1,468, 5,602)    | 2-yearly PWID testing + vaccination                                 | 6-monthly PWID testing              | 89<br>(82, 94) | 78<br>(67, 88) | \$621.81 | \$48<br>(\$42, \$54)          | \$114<br>(\$101, \$127) | \$66<br>(\$58, \$73)             |
| Mongolia         | 2,938<br>(2,910, 2,938)    | 6-monthly PWID testing + GP testing + vaccination + age vaccination | 6-monthly PWID testing + GP testing | 64<br>(59, 69) | 47<br>(41, 53) | \$2.62   | \$223<br>(\$199, \$248)       | \$12<br>(\$11, \$14)    | -\$211<br>(-\$234, -\$188)       |
| Laos             | 1,087<br>(968, 1,167)      | 6-monthly PWID testing + GP testing + vaccination + age vaccination | 6-monthly PWID testing + GP testing | 78<br>(73, 82) | 65<br>(58, 71) | \$1.37   | \$458<br>(\$407, \$508)       | \$9<br>(\$8, \$11)      | -\$448<br>(-\$497, -\$399)       |
| Fiji             | 964<br>(776, 1,069)        | 6-monthly PWID testing + vaccination                                | 6-monthly PWID testing              | 88<br>(78, 95) | 29<br>(7, 56)  | \$265.96 | \$1<br>(\$1, \$1)             | \$1<br>(\$1, \$1)       | \$0<br>(\$0, \$0)                |
| New Zealand      | 694<br>(239, 1,066)        | 2-yearly PWID testing + vaccination                                 | 6-monthly PWID testing              | 89<br>(83, 94) | 79<br>(69, 88) | \$512.43 | \$11<br>(\$9, \$12)           | \$22<br>(\$19, \$24)    | \$11<br>(\$10, \$13)             |
| Singapore        | 653<br>(322, 918)          | 2-yearly PWID testing + vaccination                                 | 6-monthly PWID testing              | 87<br>(79, 93) | 74<br>(61, 85) | \$684.15 | \$5<br>(\$4, \$5)             | \$12<br>(\$11, \$14)    | \$7<br>(\$7, \$8)                |
| Vanuatu          | 298<br>(253, 337)          | 6-monthly PWID testing + vaccination                                | **                                  | 79<br>(65, 91) | 0<br>(0, 0)    | **       | \$0<br>(\$0, \$0)             | \$0<br>(\$0, \$0)       | \$0<br>(\$0, \$0)                |
| Solomon Islands  | 54<br>(27, 76)             | 2-yearly PWID testing + vaccination                                 | 6-monthly PWID testing              | 87<br>(79, 93) | 73<br>(61, 85) | \$200.79 | \$0<br>(\$0, \$0)             | \$0<br>(\$0, \$0)       | \$0<br>(\$0, \$0)                |
| Brunei           | 49<br>(24, 68)             | 2-yearly PWID testing + vaccination                                 | 6-monthly PWID testing              | 87<br>(79, 93) | 73<br>(61, 85) | \$438.19 | \$0<br>(\$0, \$0)             | \$1<br>(\$1, \$1)       | \$0<br>(\$0, \$0)                |
| Tonga            | 10<br>(5, 14)              | 2-yearly PWID testing + vaccination                                 | 6-monthly PWID testing              | 87<br>(79, 93) | 74<br>(61, 85) | \$214.28 | \$0<br>(\$0, \$0)             | \$0<br>(\$0, \$0)       | \$0<br>(\$0, \$0)                |

\*\* Due to the high prevalence and incidence / reinfection rates among PWID, in scenarios without a vaccine even 6-monthly testing of PWID resulted in increased *cumulative* incidence.

Therefore in the absence of other prevention measures, vaccine strategies among PWID were always non-dominated.

## REFERENCES

1. Degenhardt L, Peacock A, Colledge S, et al. Global prevalence of injecting drug use and sociodemographic characteristics and prevalence of HIV, HBV, and HCV in people who inject drugs: a multistage systematic review. *The Lancet Global Health* 2017; **5**(12): e1192-e207.
2. Blach S, Zeuzem S, Manns M, et al. Global prevalence and genotype distribution of hepatitis C virus infection in 2015: a modelling study. *The Lancet Gastroenterology & Hepatology* 2017; **2**(3): 161-76.
3. Gower E, Estes C, Blach S, Razavi-Shearer K, Razavi H. Global epidemiology and genotype distribution of the hepatitis C virus infection. *J Hepatol* 2014; **61**(1 Suppl): S45-57.
4. Centre for Disease Analysis. 12 countries worldwide on track to eliminate hepatitis C infection by 2030. <http://cdfound.org/just-12-countries-worldwide-on-track-to-eliminate-hepatitis-c-infection-by-2030-with-united-kingdom-italy-and-spain-among-those-joining-the-list/>. 2018.
5. Scott N, Ólafsson S, Gottfreðsson M, et al. Modelling the elimination of hepatitis C as a public health threat in Iceland: a goal attainable by 2020. *Journal of hepatology* 2018; **68**(5): 932-9.
6. United Nations Department of Economic and Social Affairs Population Division. World Population Prospects: The 2015 Revision, DVD Edition. 2015.
7. World Health Organization. Global Hepatitis Report 2017. Geneva. Licence: CC BY-NC-SA 3.0 IGO. 2017.
8. The World Bank. GDP per capita. Available from: [https://data.worldbank.org/indicator/NY.GDP.PCAP.CD?name\\_desc=false](https://data.worldbank.org/indicator/NY.GDP.PCAP.CD?name_desc=false). 2016.
9. Guimarães ML, Marques BCL, Bertoni N, et al. Assessing the HIV-1 epidemic in Brazilian drug users: a molecular epidemiology approach. *PloS one* 2015; **10**(11): e0141372.
10. Oliveira MdLA, Yoshida CFT, Telles P, et al. Trends in HCV prevalence, risk factors and distribution of viral genotypes in injecting drug users: findings from two cross-sectional studies. *Epidemiology & Infection* 2009; **137**(7): 970-9.
11. Silva MBS, Andrade TM, Silva LK, et al. Prevalence and genotypes of hepatitis C virus among injecting drug users from Salvador-BA, Brazil. *Memórias do Instituto Oswaldo Cruz* 2010; **105**(3): 299-303.
12. Ministério da Saúde SdVeS. Boletim Epidemiológico Hepatites Virais. Brasília: Volume 49, N° 31. 2018.
13. Mathers BM, Degenhardt L, Bucello C, Lemon J, Wiessing L, Hickman M. Mortality among people who inject drugs: a systematic review and meta-analysis. *Bulletin of the World Health Organization* 2013; **91**(2): 102-23.
